# Supplementary material for: Synthesis and Properties of Twisted and Helical Azulene Oligomers and Azulene‐Based Polycyclic Hydrocarbons
Source: PubMed Central journal article supplement — ChemistryOpen. 2023 May 17;12(11):e202100298. doi: 10.1002/open.202100298 (PMC10661833; doi:10.1002/open.202100298), 2023-05-17
Supplement: OPEN-12-e202100298-s001.pdf [file OPEN-12-e202100298-s001.pdf]

# ChemistryOpen

Supporting Information

## **Synthesis and Properties of Twisted and Helical Azulene Oligomers and Azulene-Based Polycyclic Hydrocarbons**

Takahiro Tsuchiya,\* Makoto Higashibeppu, and Yasuhiro Mazaki\*

## Table of Contents

|                                                |       |    |
|------------------------------------------------|-------|----|
| Materials and methods                          | ----- | S2 |
| Synthetic procedures and characterization data | ----- | S3 |
| Additional spectra and data                    | ----- | S6 |

## S1. Materials and methods

$^1\text{H}$  and  $^{13}\text{C}$  NMR spectra were recorded on Bruker AVANCE-III-400 (400 MHz for  $^1\text{H}$ , 100 MHz for  $^{13}\text{C}$ ) or Bruker AVANCE-III-600 (600 MHz for  $^1\text{H}$ , 150 MHz for  $^{13}\text{C}$ ). Spectra are reported (in  $\delta$ ) referenced to internal  $\text{Me}_4\text{Si}$ . Mass spectra were recorded on Thermo Scientific, Exactive Plus Orbitrap Mass Spectrometer for electrospray ionization (ESI) and atmospheric pressure chemical ionization (APCI), or ITQ 700 GC/MS for electronic impact ionization (EI). IR spectra were recorded on JASCO FT/IR-610 Spectrometer. Melting points were determined with Yanaco melting point apparatus. Absorption spectra were recorded on Shimadzu UV-3600 spectrometer. Elemental analyses were performed on Perkin Elmer PE 2400-II CHNS/O analyzer and Yanaco MT-6 analyzer. Cyclic voltammetry (CV) measurements were performed on BAS Electrochemical Analyzer (Model 630E). Column chromatography was carried out using Kanto chemical silica gel 60N, 60-210  $\mu\text{m}$  meshes. Preparative gel permeation chromatography was carried out using HPLC LC-918 system (Japan Analytical Industry, Co. Ltd) equipped with polystyrene gel column JAIGEL-1H.

### Single-Crystal X-ray Diffraction

Data of **1** and **3** were collected using a Bruker APEX II CCD diffractometer with Mo  $K\alpha$  radiation ( $\lambda = 0.71073 \text{ \AA}$ ). Data of **4**• $\text{C}_{60}$  were collected using a Rigaku HyPix-600 diffractometer with Cu  $K\alpha$  radiation ( $\lambda = 1.54187 \text{ \AA}$ ). Single crystals were mounted on MiTeGen Dual-Thickness MicroMounts using a trace of mineral oil. Frames were collected, reflections were indexed and processed, and the files were scaled and corrected for absorption using Bruker *APEX3* program for **1** and **3** and Rigaku CrysAlis<sup>Pro</sup> program for **4**• $\text{C}_{60}$ . The space groups were assigned, and the structures were solved by direct methods using *XPREP* within the *SHELXTL* suite of programs and refined by full-matrix least-squares against  $F^2$  with all reflections using *SHELXL-2014* (**1** and **2**) or *SHELXL-2018* (**4**• $\text{C}_{60}$ ) with the graphical interface *SHELXLE*. CCDC 1993531 for **1**, CCDC 1993535 for **3**, and CCDC 1993536 for **4**• $\text{C}_{60}$  contain the supplementary crystallographic data for this paper. These data can be obtained free of charge from The Cambridge Crystallographic Data Centre.

## S2. Synthetic procedures and characterization data

### Synthesis of 1,2':1',2''-terazulene (1)

To a dichloromethane (10 mL) solution of 1,2'-biazulene (100 mg, 0.39 mmol) was slowly dropped a dichloromethane (30 mL) solution of *N*-bromosuccinimide (70 mg, 0.39 mmol) at  $-78\text{ }^{\circ}\text{C}$  under argon. After completion of the dropwise addition, the mixture was stirred for 3 hours. Thereafter, a saturated aqueous solution of sodium hydrogen carbonate (20 mL) was added, and the dichloromethane layer was washed with brine. After the dichloromethane solution was dried over sodium sulfate, 80 mL of hexane was added, and the mixture was filtered through aluminium oxide. The solvent of the filtrate was replaced with a mixed solvent of 1,2-dimethoxyethane/water (10:1, 44 mL) using a rotary evaporator. To this solution were added 2-(azulen-2-yl)-4,4,5,5-tetramethyl-1,3,2-dioxaborolane (**5**) (100 mg, 0.39 mmol), palladium(II) acetate (2 mg, 0.01 mmol), 2-dicyclohexylphosphino-2',6'-dimethoxybiphenyl (SPhos, 8 mg, 0.02 mmol) and tripotassium phosphate (170 mg, 0.79 mmol). The mixture was refluxed for 5 hours under argon. Then, the reaction mixture was filtered through celite, extracted with hexane, and washed with brine. The hexane layer was dried over sodium sulfate, and the solution was concentrated using a rotary evaporator. The obtained crude product was purified by silica gel column chromatography using a mixed solvent of hexane/dichloromethane (4:1) as an eluent to obtain a green solid of **1**. (91 mg, 0.24 mmol 61%)

**1**: green solid

m.p. 104–108  $^{\circ}\text{C}$

$^1\text{H}$  NMR (600 MHz,  $\text{CDCl}_3$ ):  $\delta$  8.74 (d,  $J = 10.2$  Hz, 1H), 8.72 (d,  $J = 9.6$  Hz, 1H), 8.28 (d,  $J = 9.6$  Hz, 1H), 8.26 (d,  $J = 9.0$  Hz, 1H), 8.11 (d,  $J = 9.0$  Hz, 2H), 7.69 (s, 1H), 7.60 (d,  $J = 3.6$  Hz, 1H), 7.53 (t,  $J = 10.2$  Hz, 1H), 7.49 (t,  $J = 10.2$  Hz, 1H), 7.42 (t,  $J = 9.0$  Hz, 1H), 7.30 (s, 2H), 7.26 (d,  $J = 4.2$  Hz, 1H), 7.18 (t,  $J = 9.0$  Hz, 1H), 7.16 (t,  $J = 9.0$  Hz, 1H), 7.13 (t,  $J = 9.6$  Hz, 1H), 7.10 (t,  $J = 9.6$  Hz, 1H), 7.08 (t,  $J = 9.6$  Hz, 2H).

$^{13}\text{C}$  NMR (150 MHz,  $\text{CDCl}_3$ ):  $\delta$  147.0, 146.3, 142.7, 141.8, 140.6, 140.2, 138.8, 138.2, 137.0, 136.9, 136.9, 136.4, 135.4, 135.4, 134.9, 134.8, 127.2, 125.7, 124.98, 124.54, 124.1, 123.9, 123.2, 119.6, 119.4, 118.3.

IR (KBr):  $\nu_{\text{max}}$  1567, 1509, 1380, 897, 781, 732  $\text{cm}^{-1}$

MS (ESI)  $m/z$ : 381.16  $[\text{M} + \text{H}]^+$ .

UV-vis (THF)  $\lambda_{\text{max}}$  ( $\epsilon$ ): 234 (41500), 262 (51500), 289 (56000), 316 (49700), 432 (29600), 580 (1170) nm.

Anal. Calcd for  $\text{C}_{30}\text{H}_{20}$ : C, 94.70; H, 5.30. Found: C, 94.80; H, 5.49.

### Synthesis of 1,2':1',2'':1'',2'''-quaterazulene (**2**) and azuleno[1,2-*e*]dicyclohepta[*a,h*]-*as*-indacene (**3**)

To a dichloromethane (15 mL) solution of **1** (175 mg, 0.46 mmol) was slowly dropped a dichloromethane (45 mL) solution of *N*-bromosuccinimide (80 mg, 0.46 mmol) at  $-78$  °C under argon. After completion of the dropwise addition, the mixture was stirred for 3 hours. Thereafter, a saturated aqueous solution of sodium hydrogen carbonate (30 mL) was added, and the dichloromethane layer was washed with brine. After the dichloromethane solution was dried over sodium sulfate, 80 mL of hexane was added, and the mixture was filtered through aluminium oxide. The solvent of the filtrate was replaced with a mixed solvent of 1,2-dimethoxyethane/water (10:1, 11 mL) using a rotary evaporator. To this solution were added 2-(azulen-2-yl)-4,4,5,5-tetramethyl-1,3,2-dioxaborolane (**5**) (115 mg, 0.45 mmol), palladium(II) acetate (3 mg, 0.01 mmol), 2-dicyclohexylphosphino-2',6'-dimethoxybiphenyl (SPhos, 9 mg, 0.023 mmol) and tripotassium phosphate (190 mg, 0.9 mmol). The mixture was refluxed for 15 hours under argon. Then, the reaction mixture was filtered through celite, extracted with hexane, and washed with brine. The hexane layer was dried over sodium sulfate, and the solution was concentrated using a rotary evaporator. The obtained crude product was purified by preparative gel permeation chromatography with chloroform to obtain a green solid of **2** (18 mg, 0.036 mmol 8%) and a black solid of **3** (63 mg, 0.16 mmol, 36%).

**2**: brown solid

m.p. 178–181 °C

$^1\text{H}$  NMR (400 MHz,  $\text{CDCl}_3$ ):  $\delta$  8.62 (d,  $J = 9.7$  Hz, 1H), 8.46 (d,  $J = 9.8$  Hz, 1H), 8.36–8.29 (m, 2H), 8.03 (d,  $J = 9.4$  Hz, 1H), 7.84 (d,  $J = 9.8$  Hz, 1H), 7.75 (s, 1H), 7.57 (d,  $J = 9.2$  Hz, 2H), 7.50–7.48 (m, 3H), 7.24–7.15 (m, 4H), 7.10–7.03 (m, 3H), 7.02–6.89 (m, 2H), 6.75 (t,  $J = 9.8$  Hz, 2H), 6.39 (s, 2H), 6.29 (t,  $J = 9.8$  Hz, 1H).

$^{13}\text{C}$  NMR (100 MHz,  $\text{CDCl}_3$ ):  $\delta$  147.5, 147.0, 146.6, 142.1, 141.7, 141.6, 139.8, 138.8, 138.4, 137.8, 137.4, 136.8, 136.1, 135.7, 135.6, 135.2, 135.1, 134.7, 134.4, 134.3, 133.8, 127.8, 126.9, 126.0, 124.33, 124.29, 124.0, 123.9, 123.1, 122.7, 122.3, 120.2, 118.5, 118.2, 117.5.

IR (KBr):  $\nu_{\text{max}}$  1722, 1568, 1512, 1511, 1460, 1384, 1261, 1096, 1028, 799, 726  $\text{cm}^{-1}$

MS (EI)  $m/z$ : 507.26 [M + H] $^+$ .

UV-vis (THF)  $\lambda_{\text{max}}$  ( $\epsilon$ ): 258 (53600), 290 (57300), 430 (30300), 580 (1230) nm

Anal. Calcd for  $\text{C}_{40}\text{H}_{26}$ : C, 94.83; H, 5.17. Found: C, 94.71; H, 5.09.

**3**: black solid

m.p. 245–250 °C

$^1\text{H}$  NMR (600 MHz,  $\text{CDCl}_3$ ):  $\delta$  9.37 (d,  $J = 9.5$  Hz, 3H), 8.55 (d,  $J = 9.5$  Hz, 3H), 8.49 (s, 3H), 7.67 (t, 3H,  $J = 9.5$  Hz), 7.61 (t,  $J = 9.5$  Hz, 3H), 7.41 (t,  $J = 9.5$  Hz, 3H).

$^{13}\text{C}$  NMR (150 MHz,  $\text{CDCl}_3$ ):  $\delta$  143.9, 142.3, 139.1, 134.6, 134.0, 131.3, 125.8, 125.1, 120.0, 114.7

IR (KBr):  $\nu_{\max}$  1574, 1531, 1414, 804, 757, 710, 687  $\text{cm}^{-1}$ .

MS (ESI)  $m/z$ : 379.16 [M + H]<sup>+</sup>.

UV-vis (THF)  $\lambda_{\max}$  ( $\epsilon$ ): 257 (24400), 304 (26000), 397 (46500), 456 (61700), 743 (250, sh) nm

Anal. Calcd for C<sub>30</sub>H<sub>18</sub>: C, 95.21; H, 4.79. Found: C, 95.12; H, 4.70.

**Synthesis of azuleno[1,2-*e*]dicyclohepta[*a,h*]-as-indacene (3) and diazuleno[1,2-*a*:1',2'-*c*]-cyclopenta[*ef*]heptalene (4)**

To a dichloromethane (15 mL) solution of **1** (175 mg, 0.46 mmol) was slowly dropped a dichloromethane (45 mL) solution of *N*-bromosuccinimide (80 mg, 0.46 mmol) at  $-78$  °C under argon. After completion of the dropwise addition, the mixture was stirred for 3 hours. Thereafter, a saturated aqueous solution of sodium hydrogen carbonate (30 mL) was added, and the dichloromethane layer was washed with brine. After the dichloromethane solution was dried over sodium sulfate, 80 mL of hexane was added, and the mixture was filtered through aluminium oxide. The solvent of the filtrate was replaced with toluene (60 mL) using a rotary evaporator. To this solution were added tris(dibenzylideneacetone)dipalladium(0) (18 mg, 0.02 mmol), ligand (0.024 mmol) and caesium carbonate (290 mg, 0.9 mmol). The mixture was refluxed for 20 hours under argon. Then, the reaction mixture was filtered through celite and washed with brine. The hexane layer was dried over sodium sulfate, and the solution was concentrated using a rotary evaporator. The obtained crude product was purified by preparative gel permeation chromatography with chloroform to obtain black solids of **3** (16–69%) and **4** (12–18%).

**4**: black solid

m.p. 134–138 °C

<sup>1</sup>H NMR (600 MHz, CDCl<sub>3</sub>):  $\delta$  8.84 (d,  $J$  = 9.6 Hz, 1H), 8.74 (d,  $J$  = 9.6 Hz, 1H), 8.22 (d,  $J$  = 4.2 Hz, 1H), 8.01 (d,  $J$  = 9.6 Hz, 1H), 7.89 (d,  $J$  = 9.6 Hz, 1H), 7.87 (d,  $J$  = 9.6 Hz, 1H), 7.74 (s, 1H), 7.61 (d,  $J$  = 10.8 Hz, 1H), 7.36 (t,  $J$  = 9.6 Hz, 1H), 7.31 (s, 1H), 7.24–7.16 (m, 3H), 7.10 (t,  $J$  = 9.6 Hz, 1H), 7.04 (t,  $J$  = 9.6 Hz, 1H), 6.98–6.94 (m, 2H), 6.66 (t,  $J$  = 9.6 Hz, 1H).

<sup>13</sup>C NMR (150 MHz, CDCl<sub>3</sub>):  $\delta$  150.0, 149.9, 147.8, 145.4, 143.8, 143.0, 141.64, 141.60, 141.2, 138.1, 137.0, 136.6, 135.4, 134.5, 134.2, 133.0, 132.9, 131.5, 127.8, 127.6, 126.9, 126.2, 126.1, 125.9, 125.8, 123.0, 120.8, 119.1, 117.9, 117.5, 114.7.

IR (KBr):  $\nu_{\max}$  1562, 1508, 1407, 1026, 800, 713  $\text{cm}^{-1}$ .

MS (ESI)  $m/z$ : 379.16 [M + H]<sup>+</sup>.

UV-vis (THF)  $\lambda_{\max}$  ( $\epsilon$ ): 240 (24900), 350 (16000), 461 (30200), 870 (80, sh) nm

Anal. Calcd for C<sub>30</sub>H<sub>18</sub>: C, 95.21; H, 4.79. Found: C, 95.25; H, 4.66.

### S3. Additional spectra and data

Table S1. Conditions and Products for the Pd-Catalyzed Ring-Closing Reaction of **1**

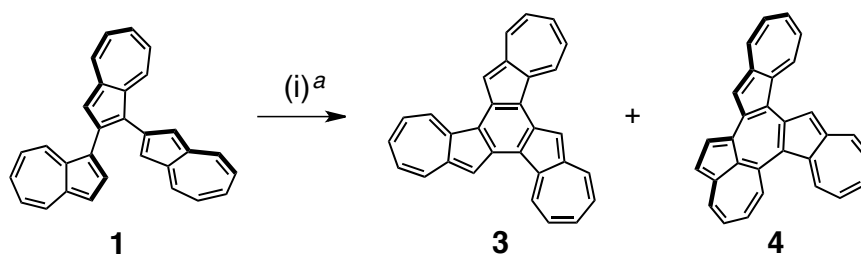

| ligand                             | Yields / % |          |
|------------------------------------|------------|----------|
|                                    | <b>3</b>   | <b>4</b> |
| DPPF <sup>b</sup>                  | 28         | 18       |
| PPh <sub>3</sub>                   | 36         | 12       |
| SPhos <sup>c</sup>                 | 69         | –        |
| XPhos <sup>d</sup>                 | 22         | –        |
| <sup>t</sup> Bu-XPhos <sup>e</sup> | 16         | –        |

<sup>a</sup> Reagents and conditions: 1) NBS, CH<sub>2</sub>Cl<sub>2</sub>, –78 °C, 3 h, 2) [Pd(dba)<sub>2</sub>], ligand, Cs<sub>2</sub>CO<sub>3</sub>, toluene, reflux, 24 h. <sup>b</sup> 1,10-Bis(diphenylphosphino)ferrocene. <sup>c</sup> 2-Dicyclohexylphosphino-2',6'-dimethoxybiphenyl. <sup>d</sup> 2-Dicyclohexylphosphino-2',4',6'-triisopropylbiphenyl. <sup>e</sup> Di-*tert*-butyl(2',4',6'-triisopropyl-[1,1'-biphenyl]-2-yl)phosphine.

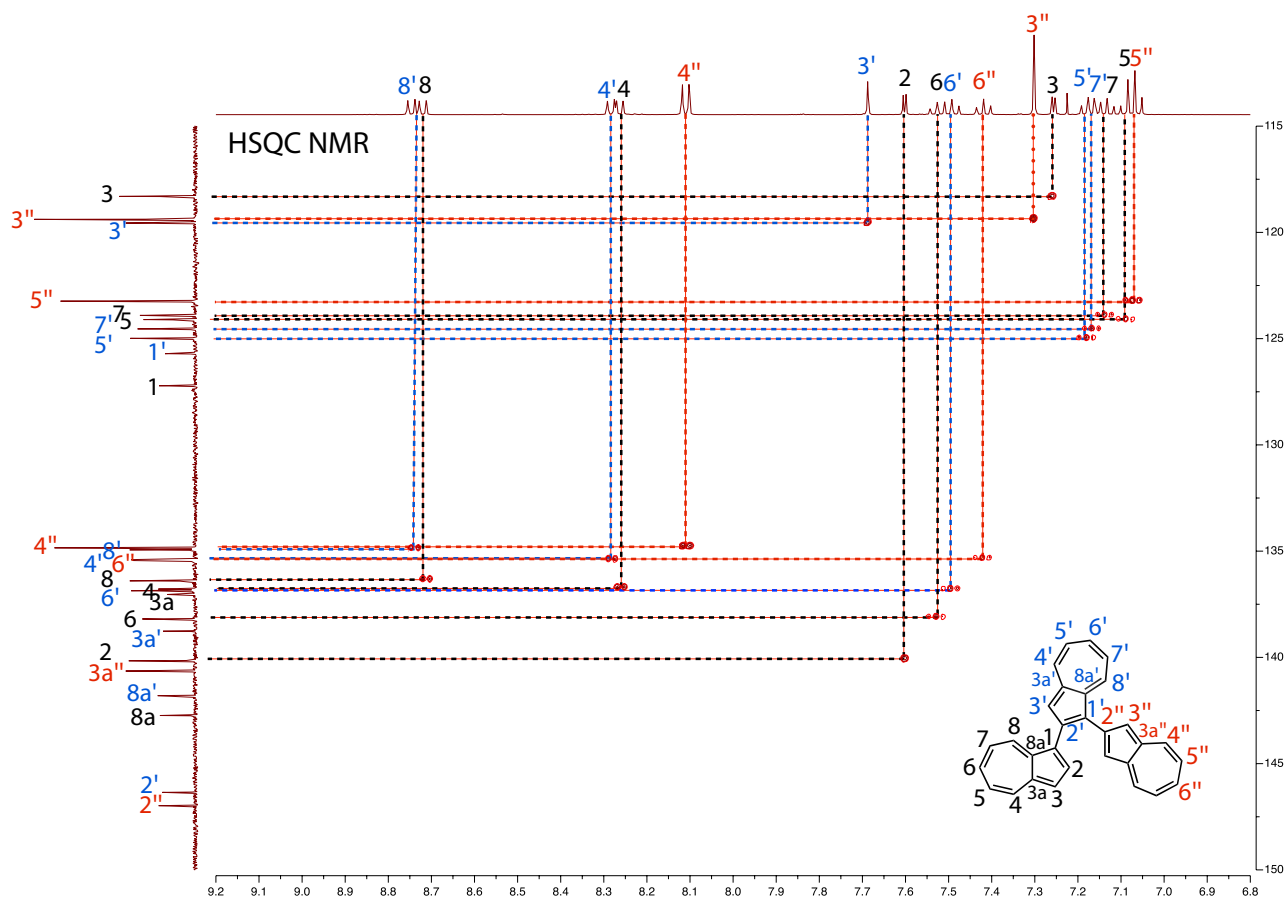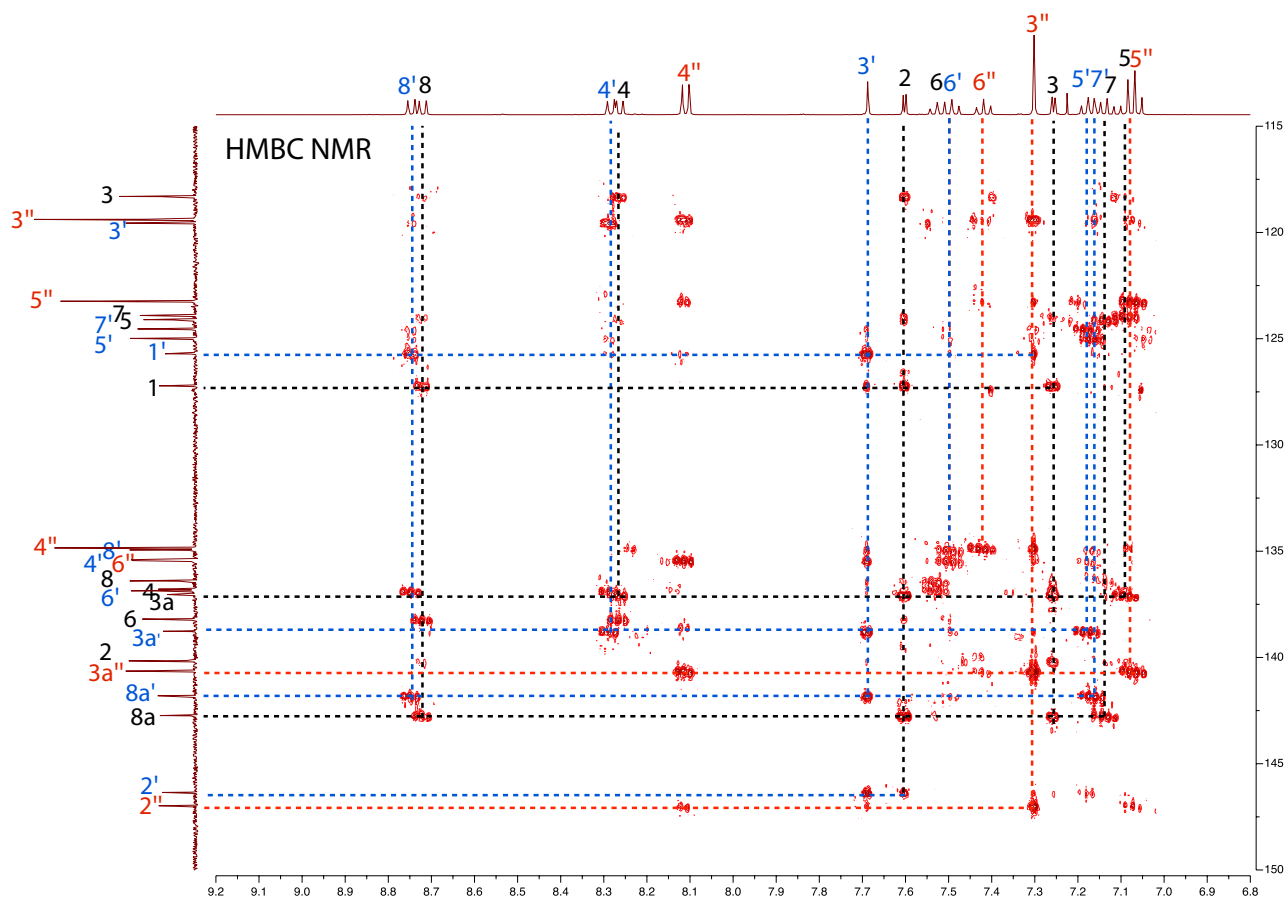

Figure S1. HSQC and HMBC NMR spectra of **1**.



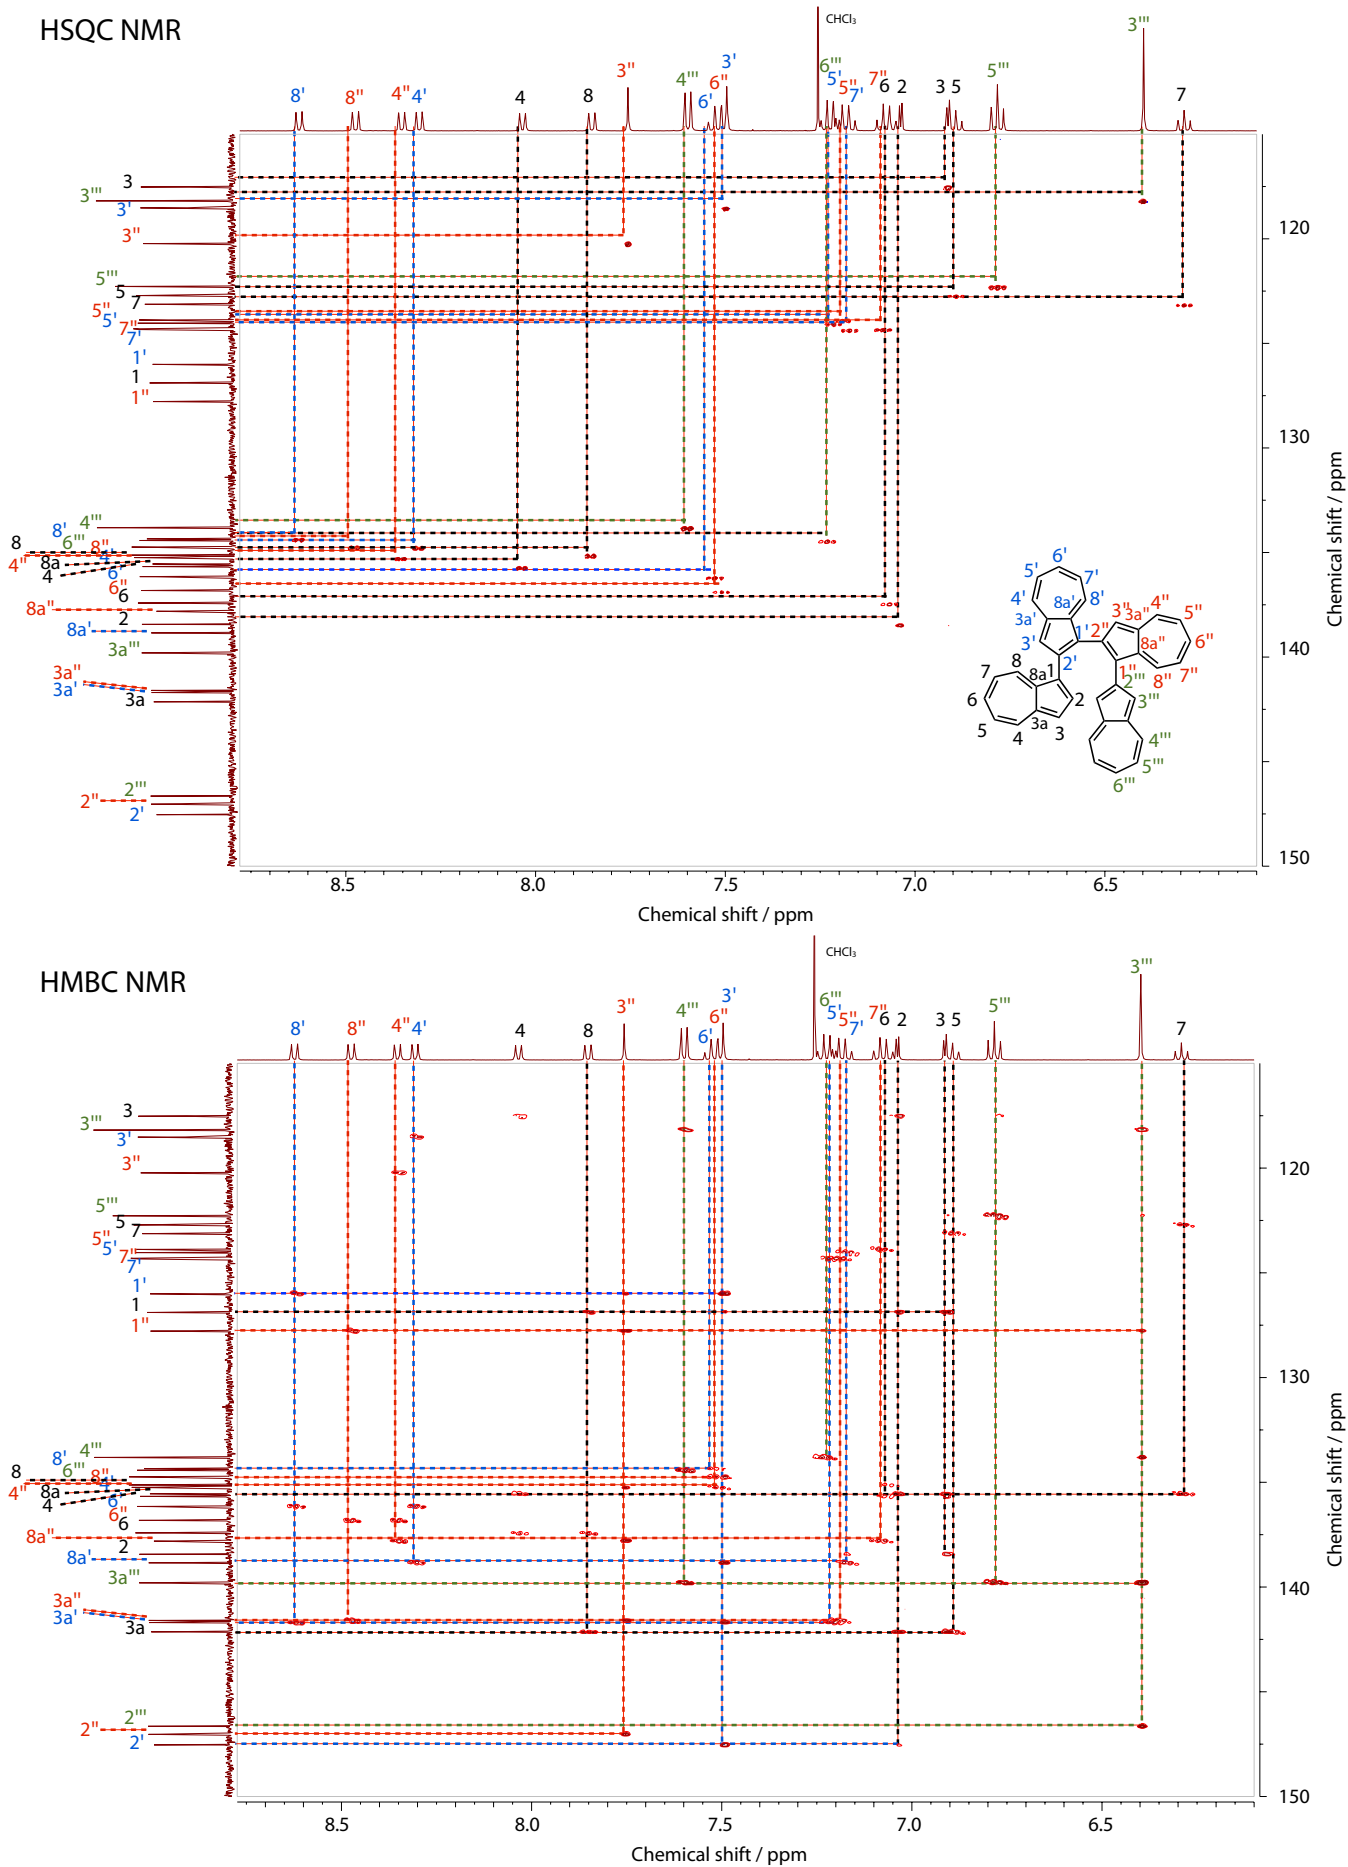

$^1\text{H}$ - $^1\text{H}$  COSY NMR

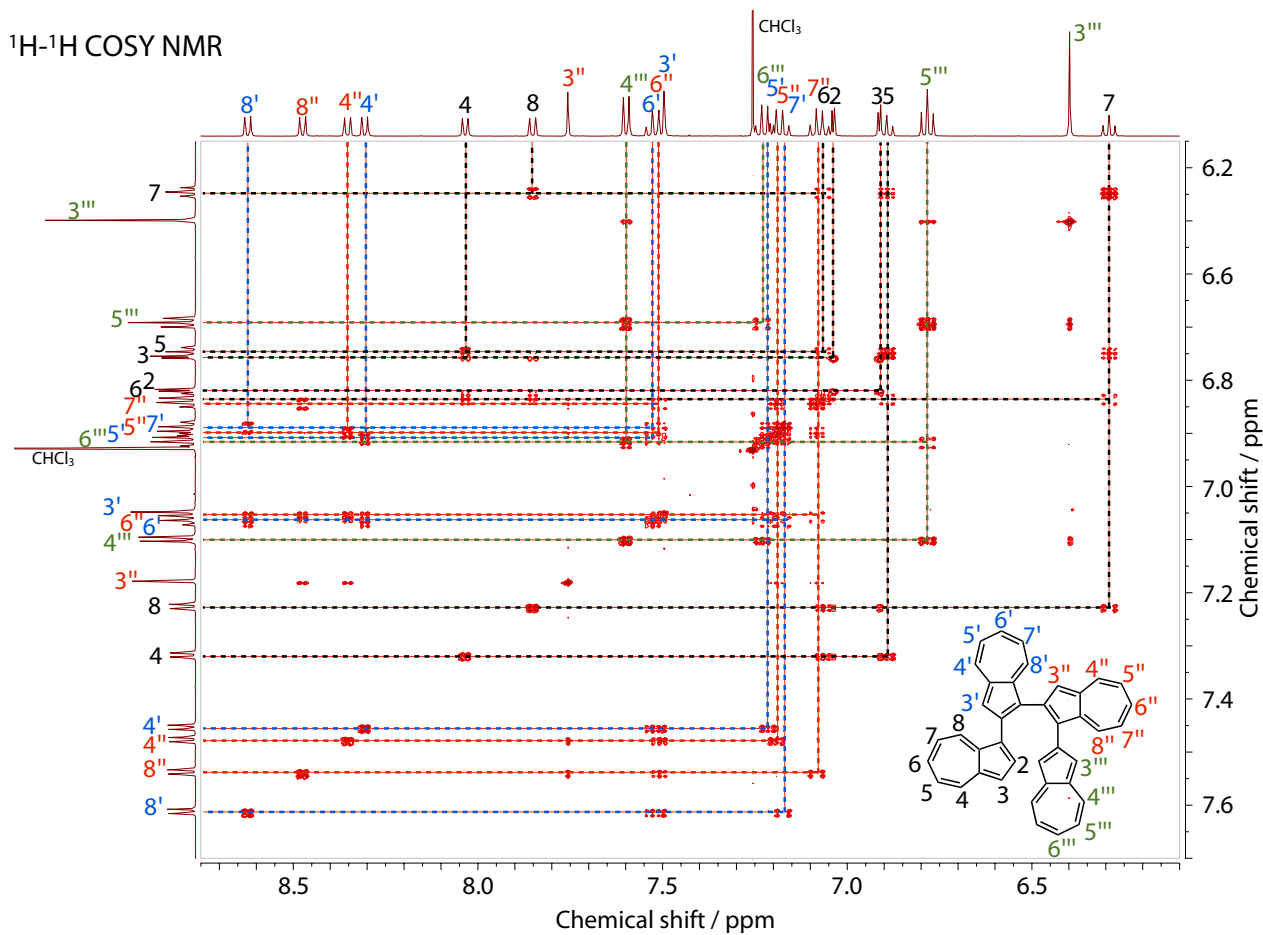

NOESY NMR

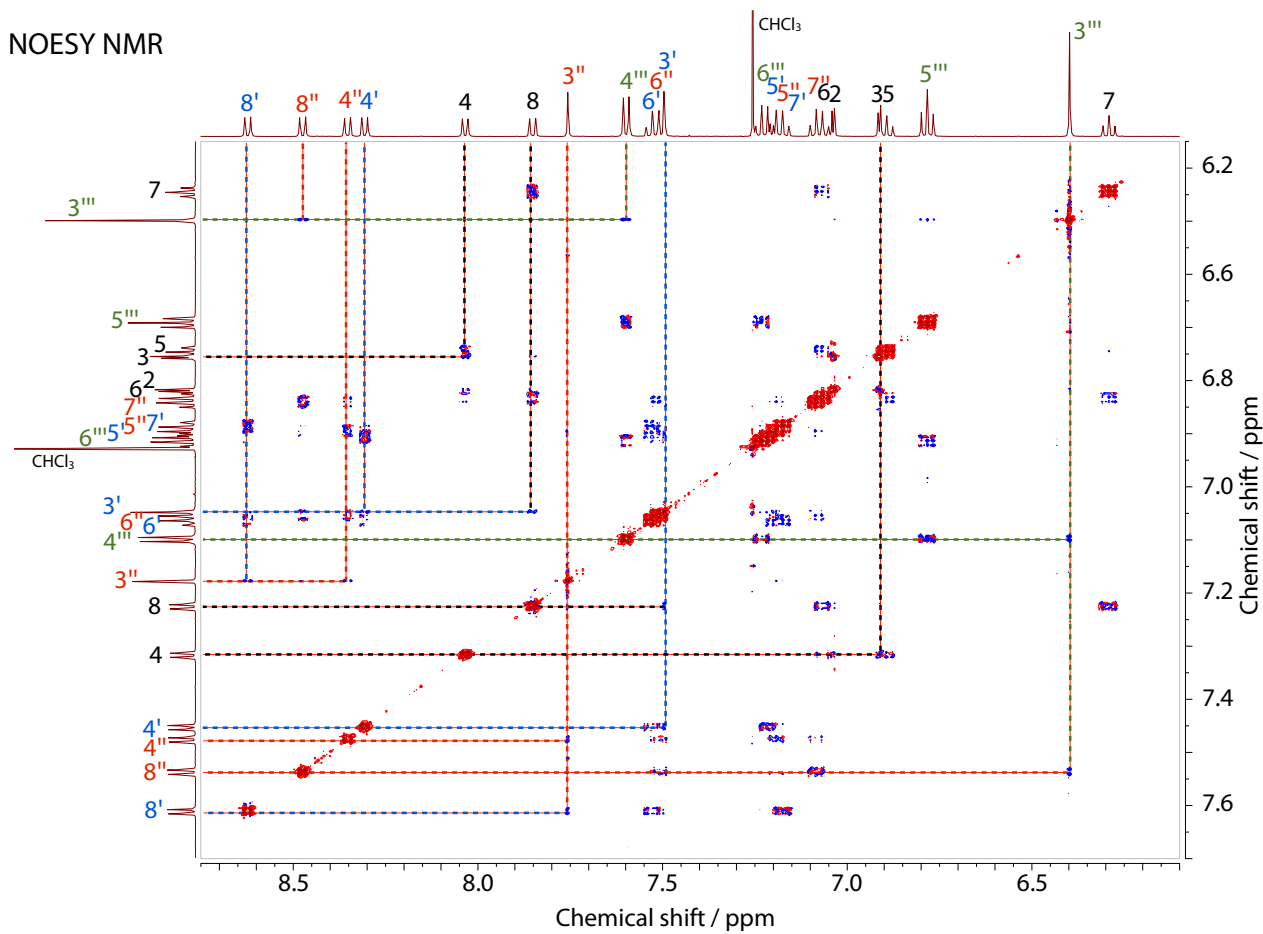

**Figure S3.**  $^1\text{H}$ - $^1\text{H}$  COSY and NOESY NMR spectra of **2** in  $\text{CDCl}_3$ .

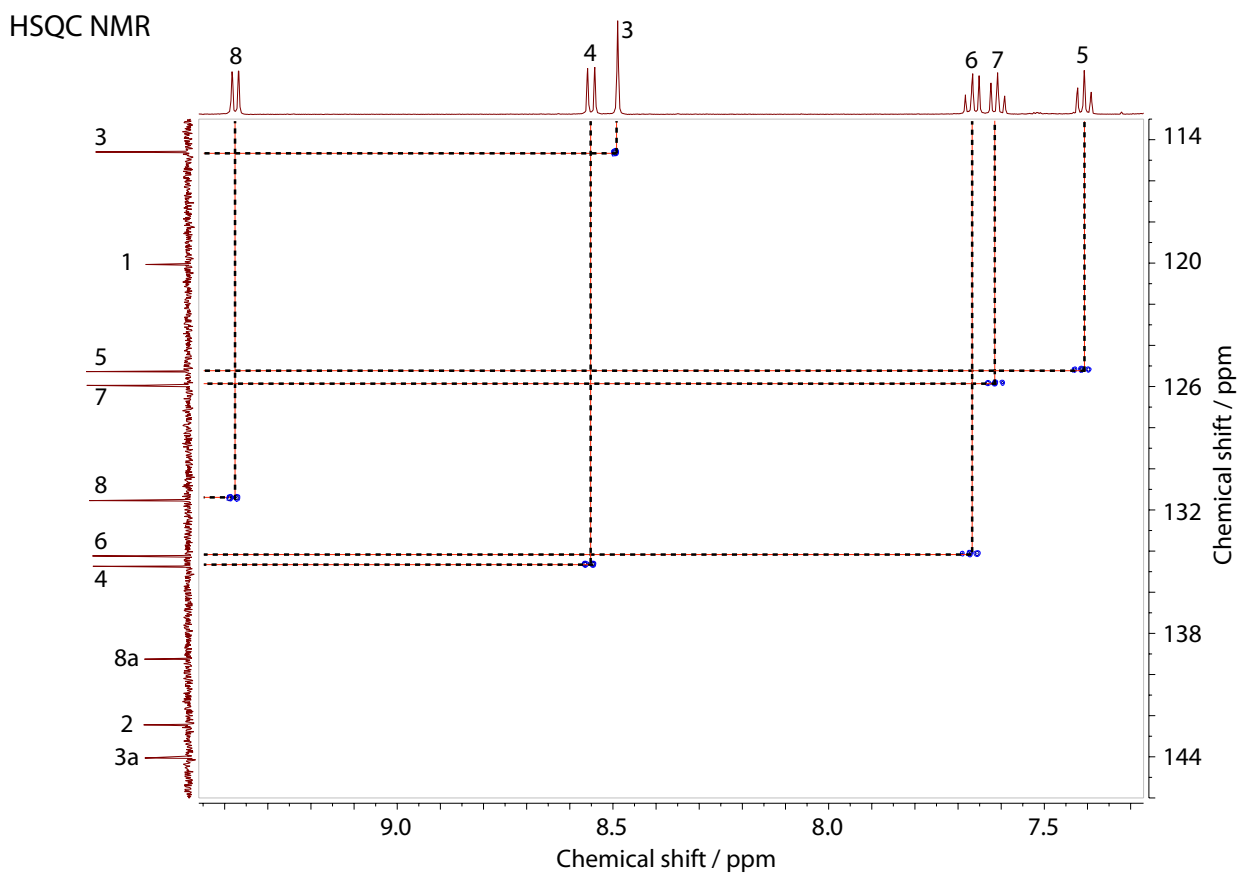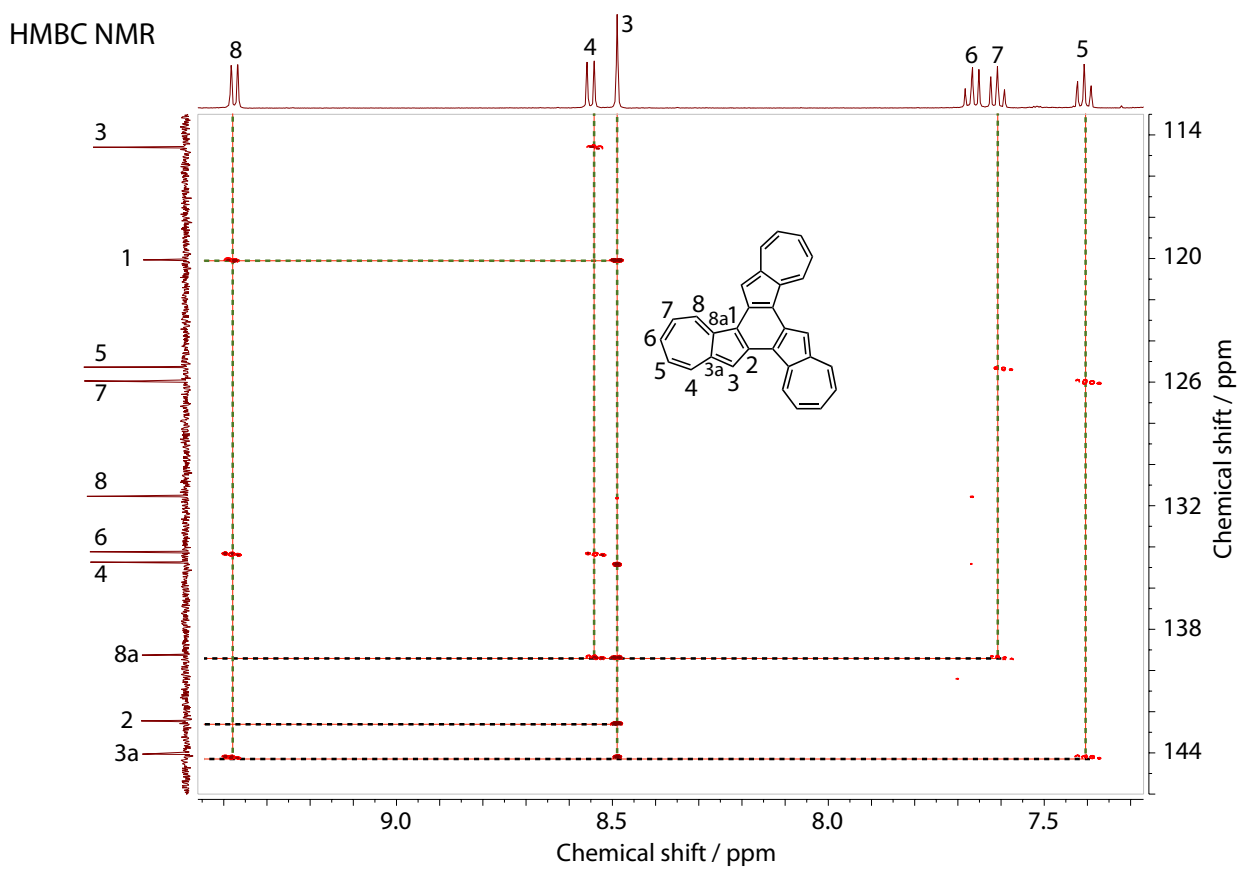

**Figure S4.** HSQC and HMBC NMR spectra of **3** in CDCl<sub>3</sub>.

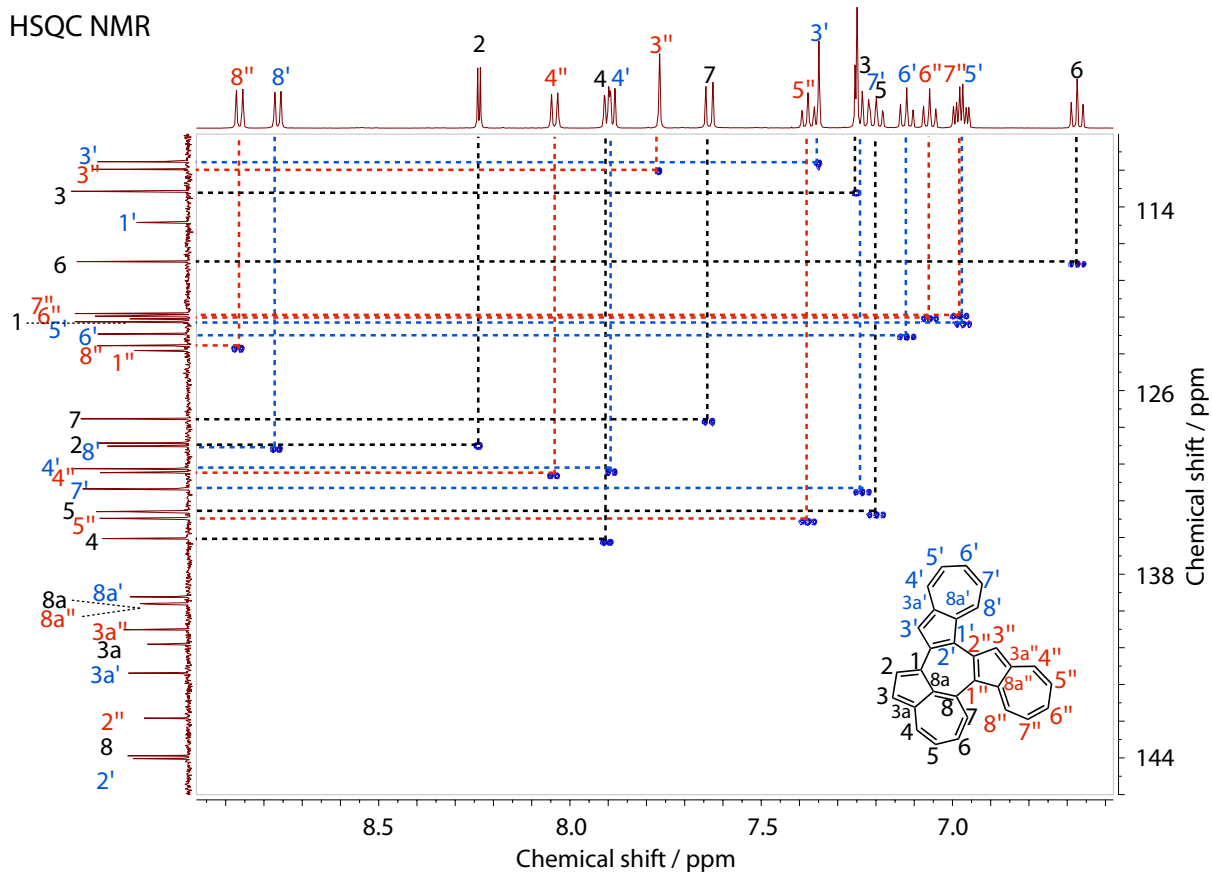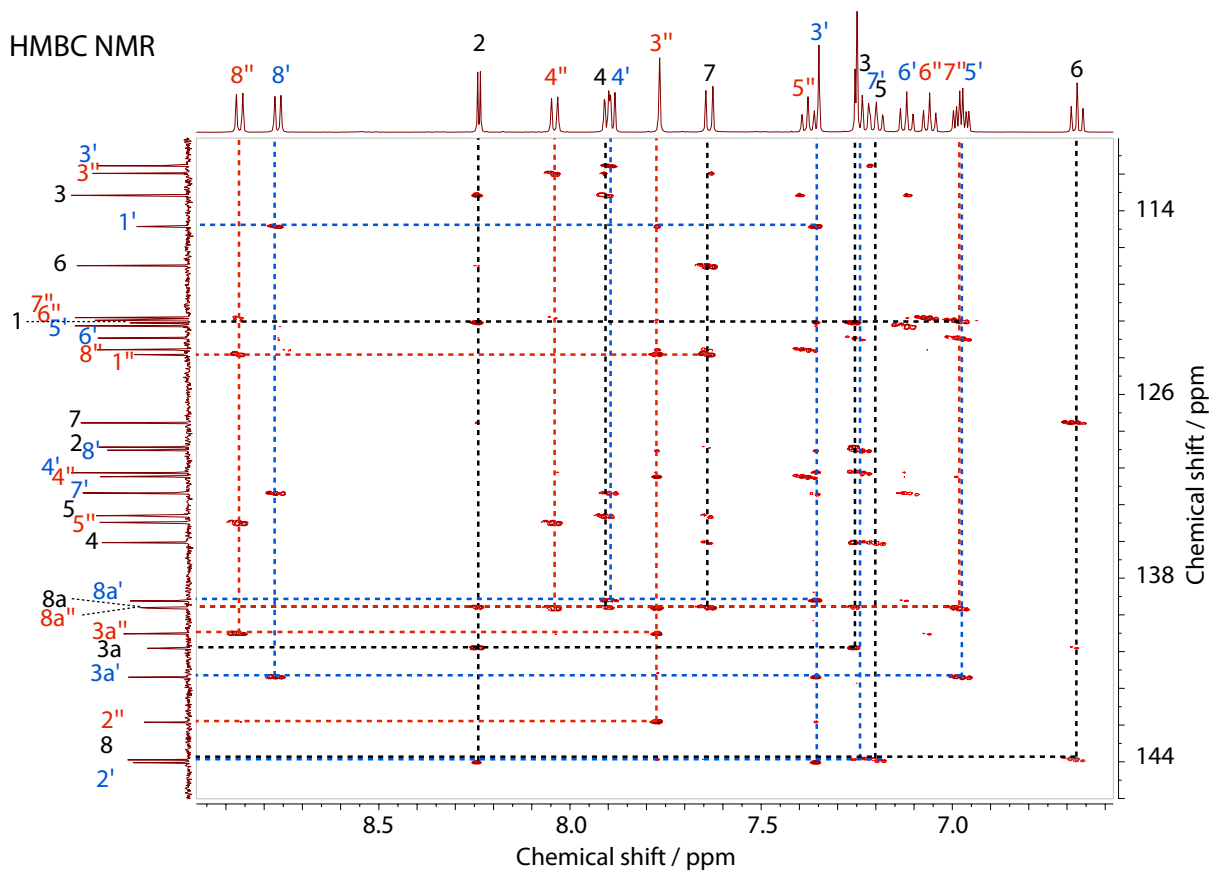

**Figure S5** HSQC and HMBC NMR spectra of **4** in  $\text{CDCl}_3$ .



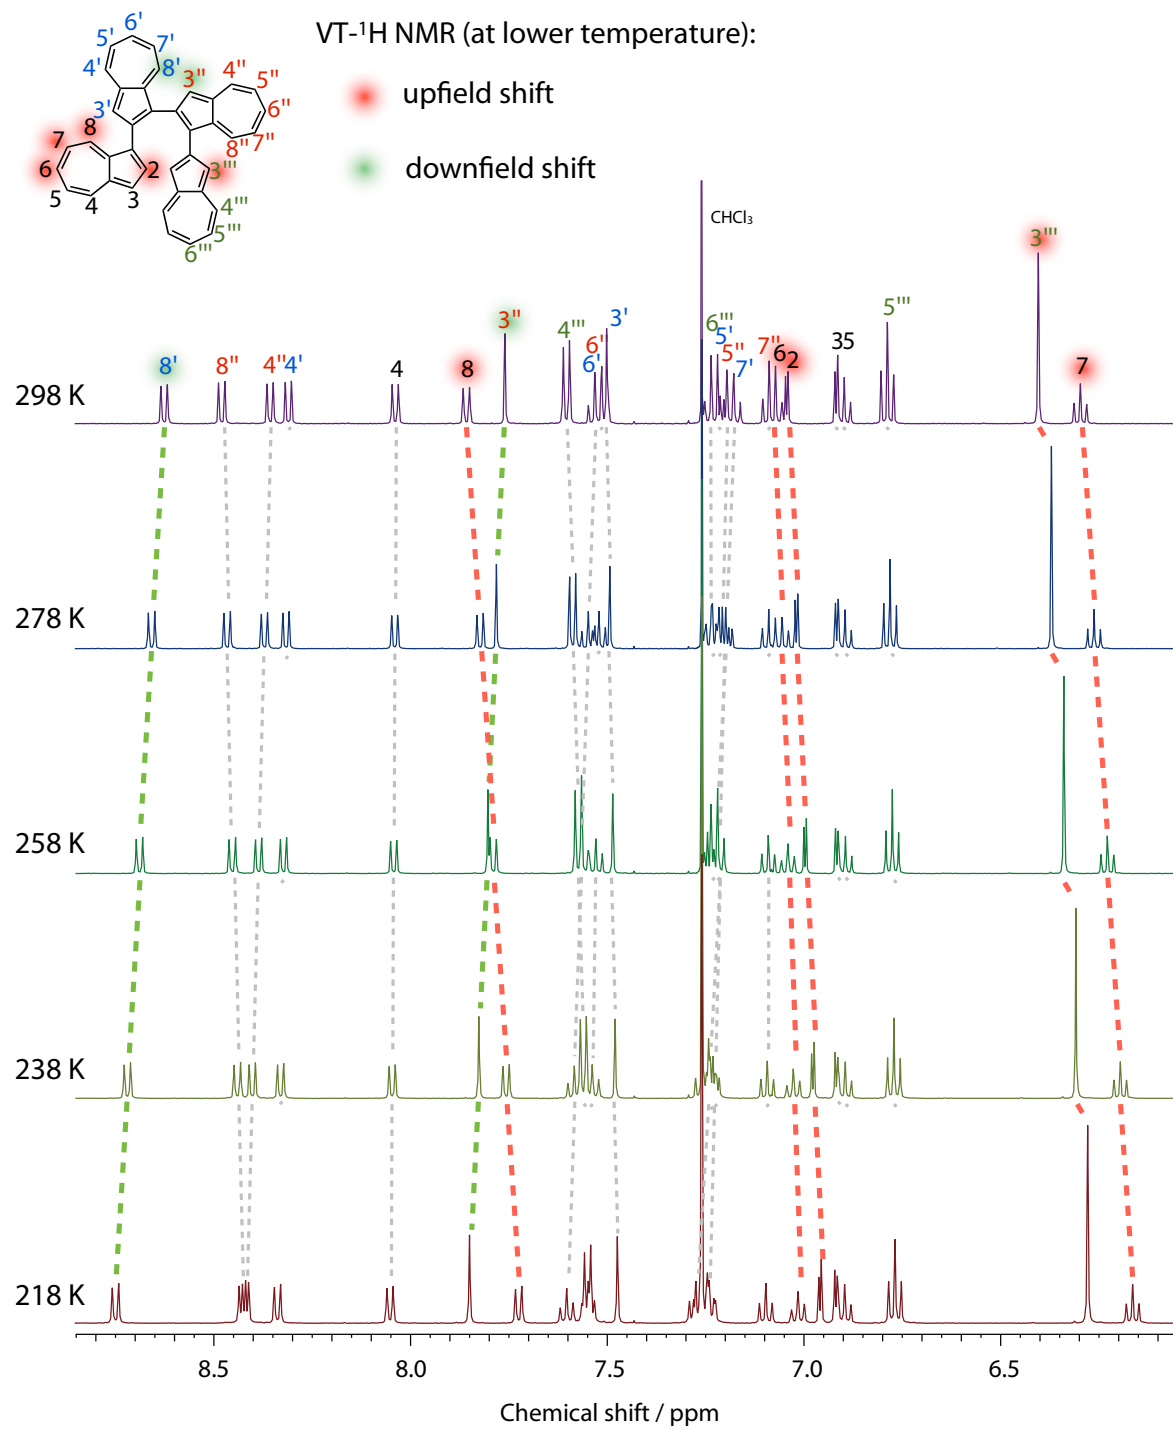

**Figure S7.** Valuable-Temperature <sup>1</sup>H NMR spectra of **2** in CDCl<sub>3</sub>.

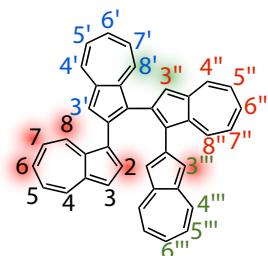

VT-<sup>1</sup>H NMR (at lower temperature):

● upfield shift

● downfield shift

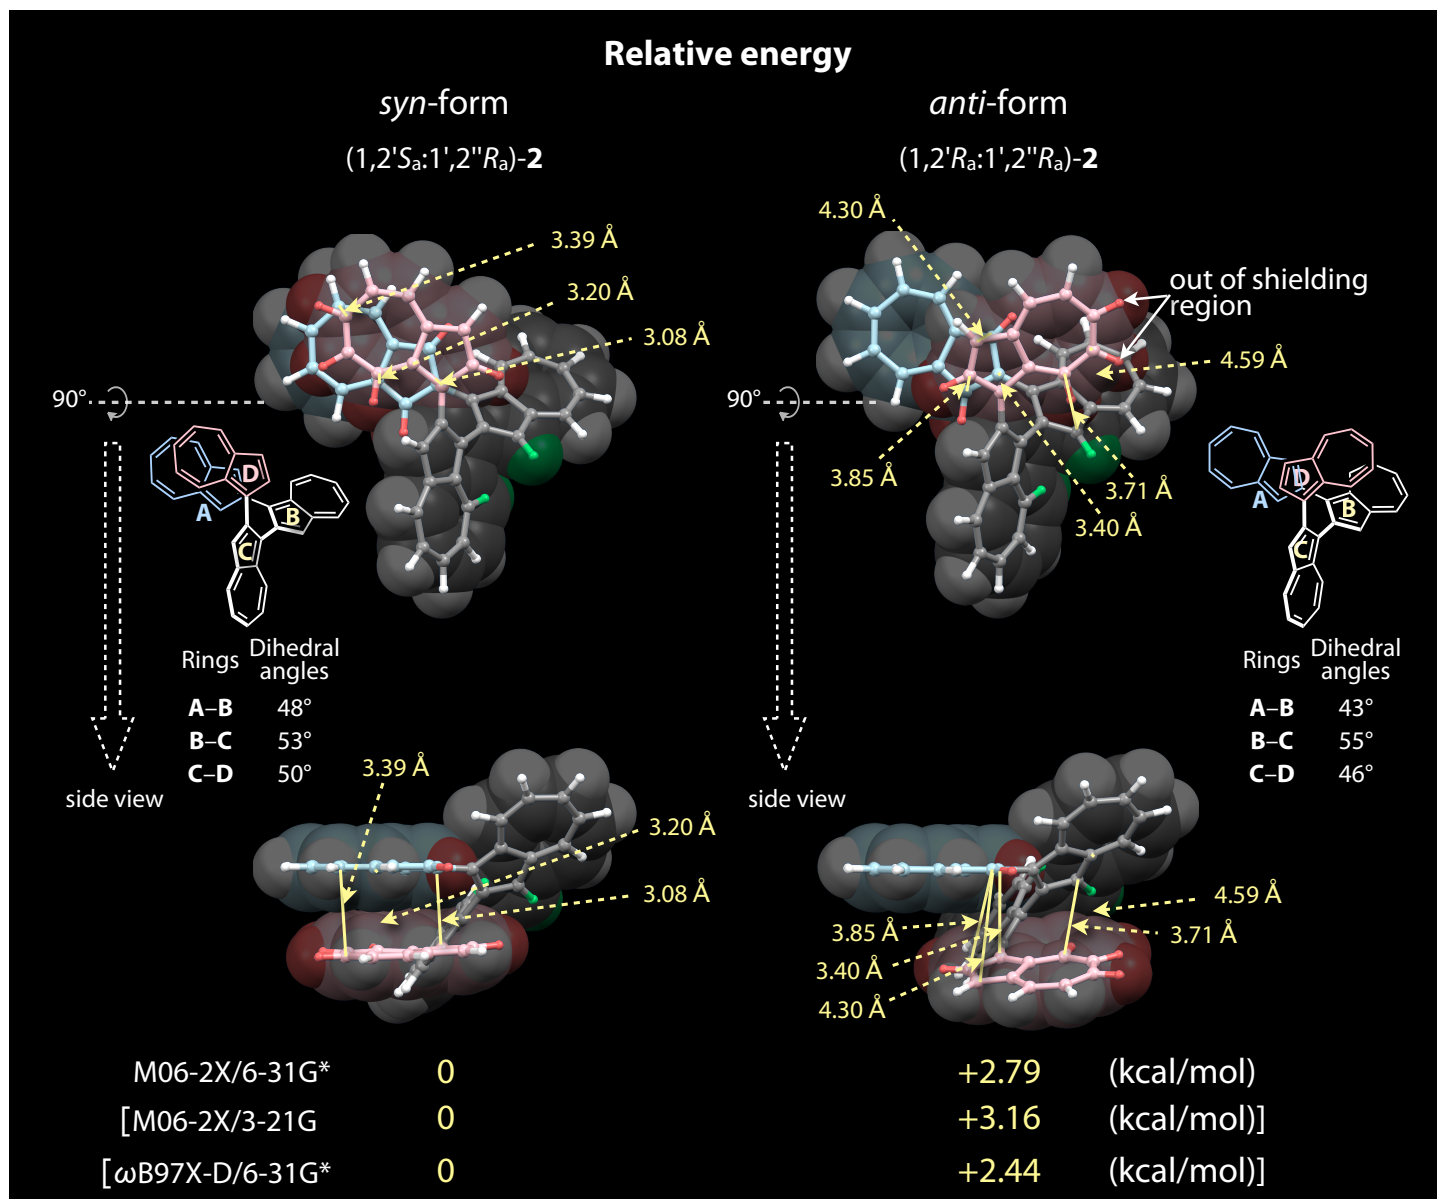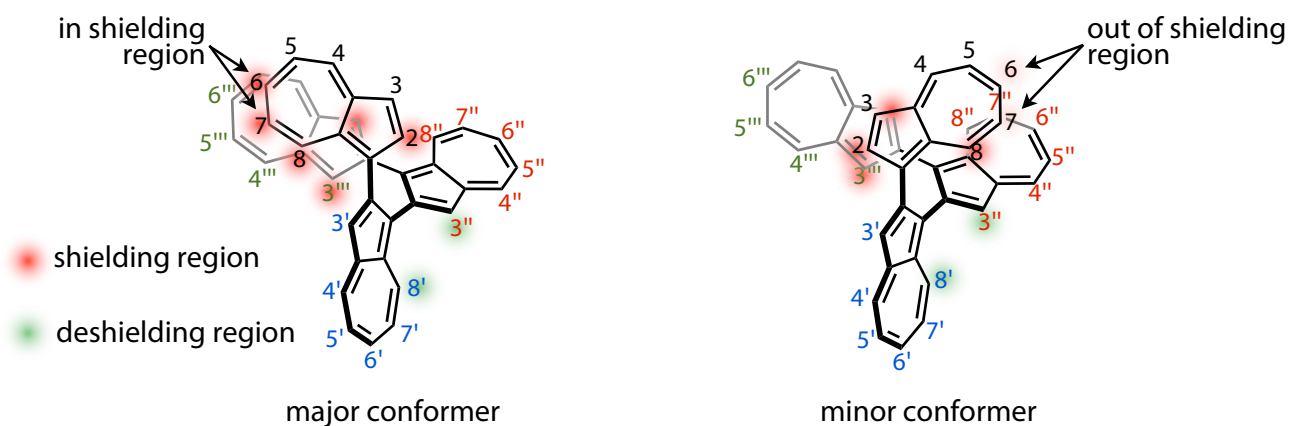

**Figure S8.** Relative energies for the *syn*- and *anti*-forms of **2**.

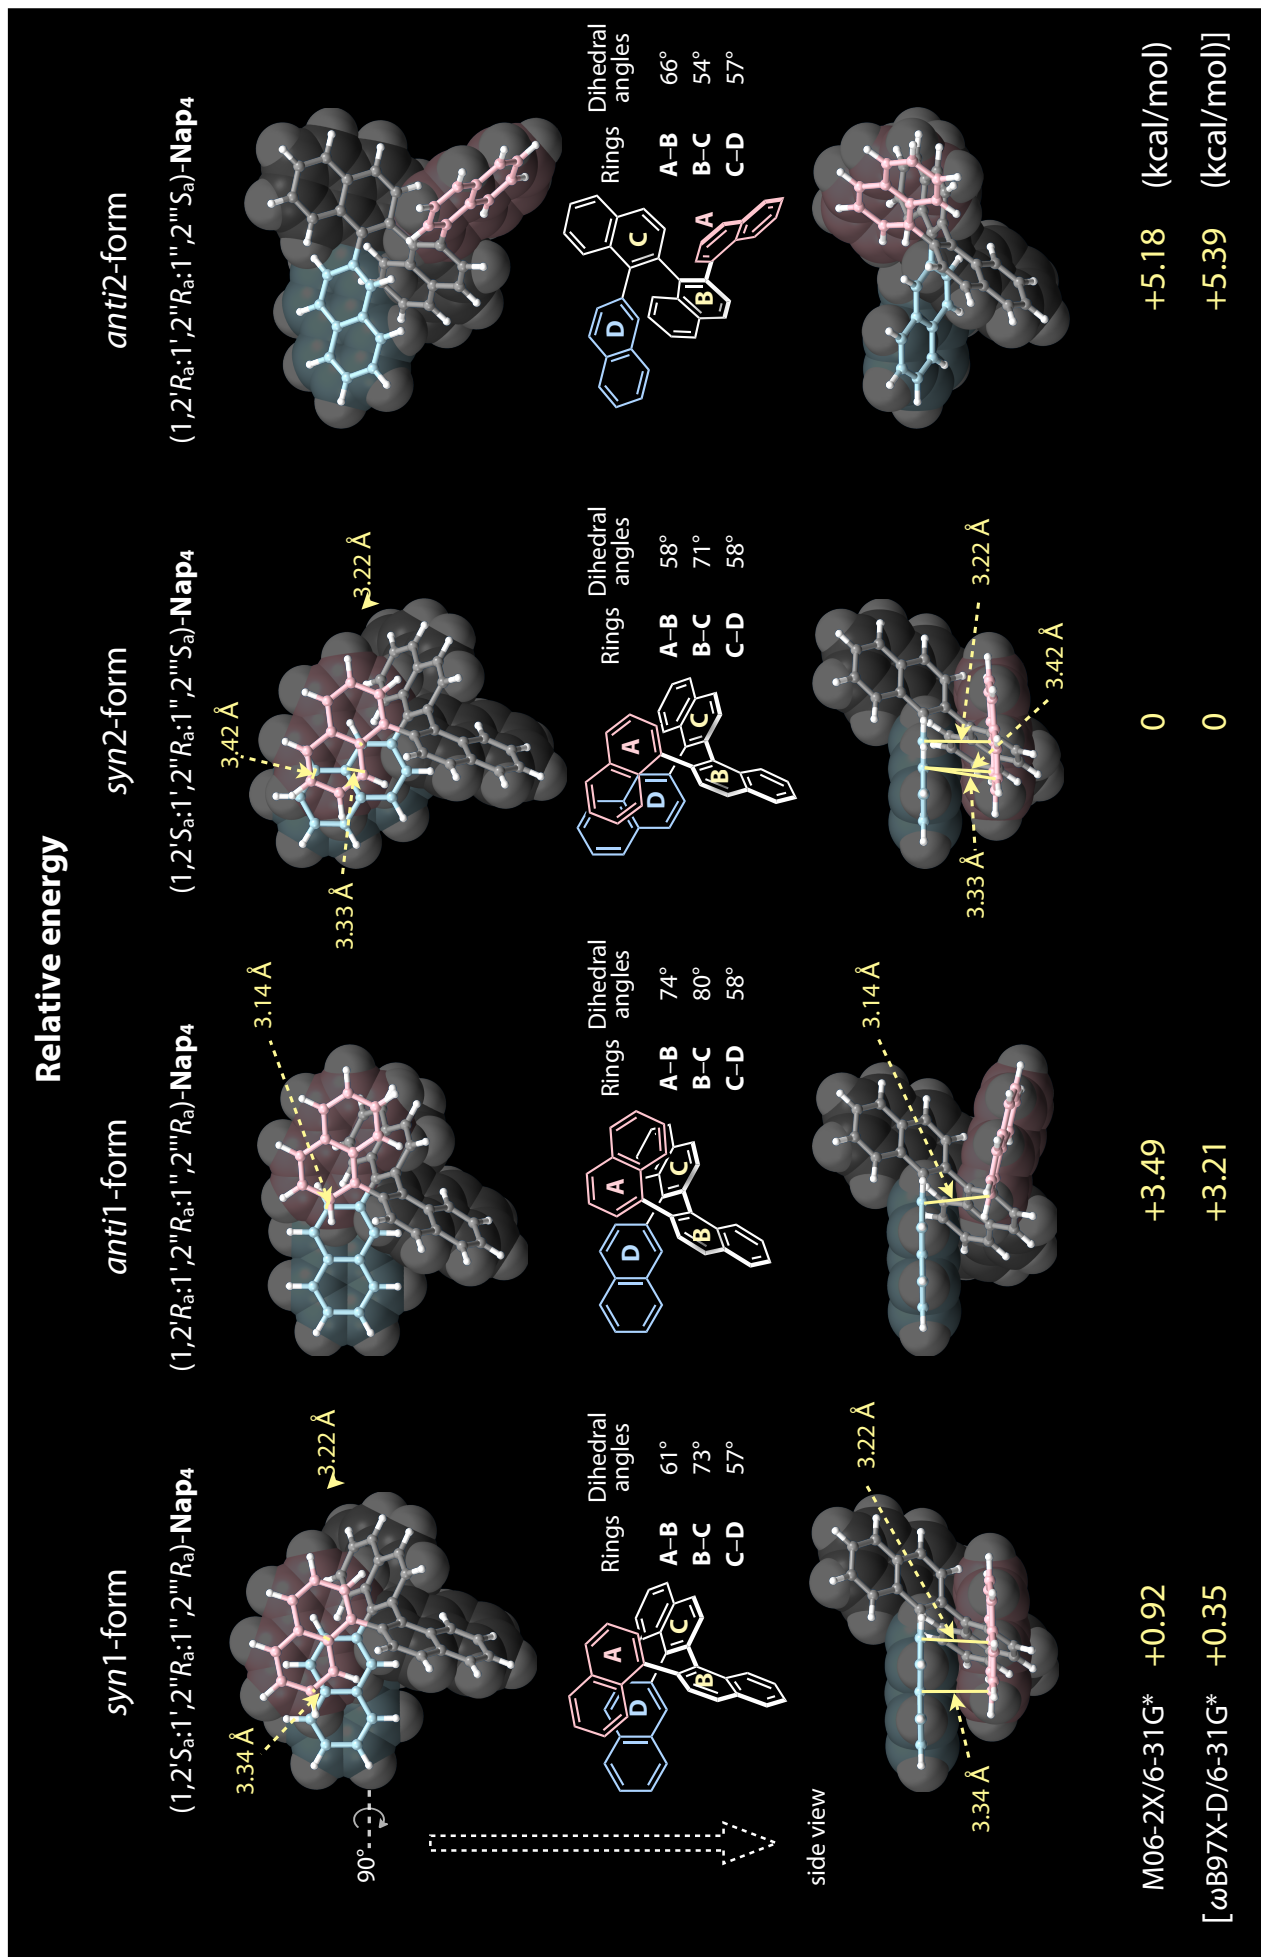

**Figure S9.** Relative energies for the *syn*- and *anti*-forms of 1,2':1',2''-quaternaphthalene (**6**, **Nap**<sub>4</sub>).



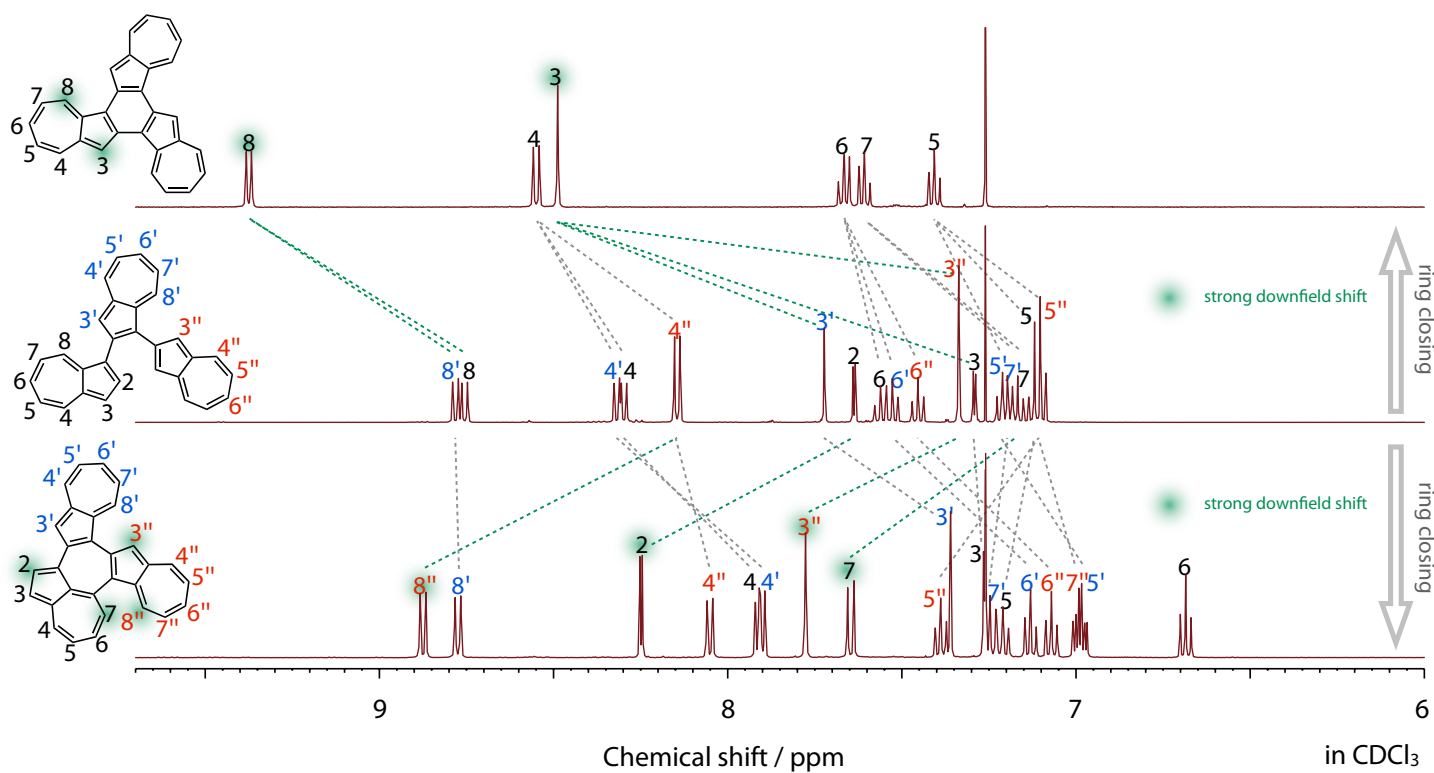

**Figure S10.** Comparison of  $^1\text{H}$  NMR spectra of **1**, **3**, and **4**.

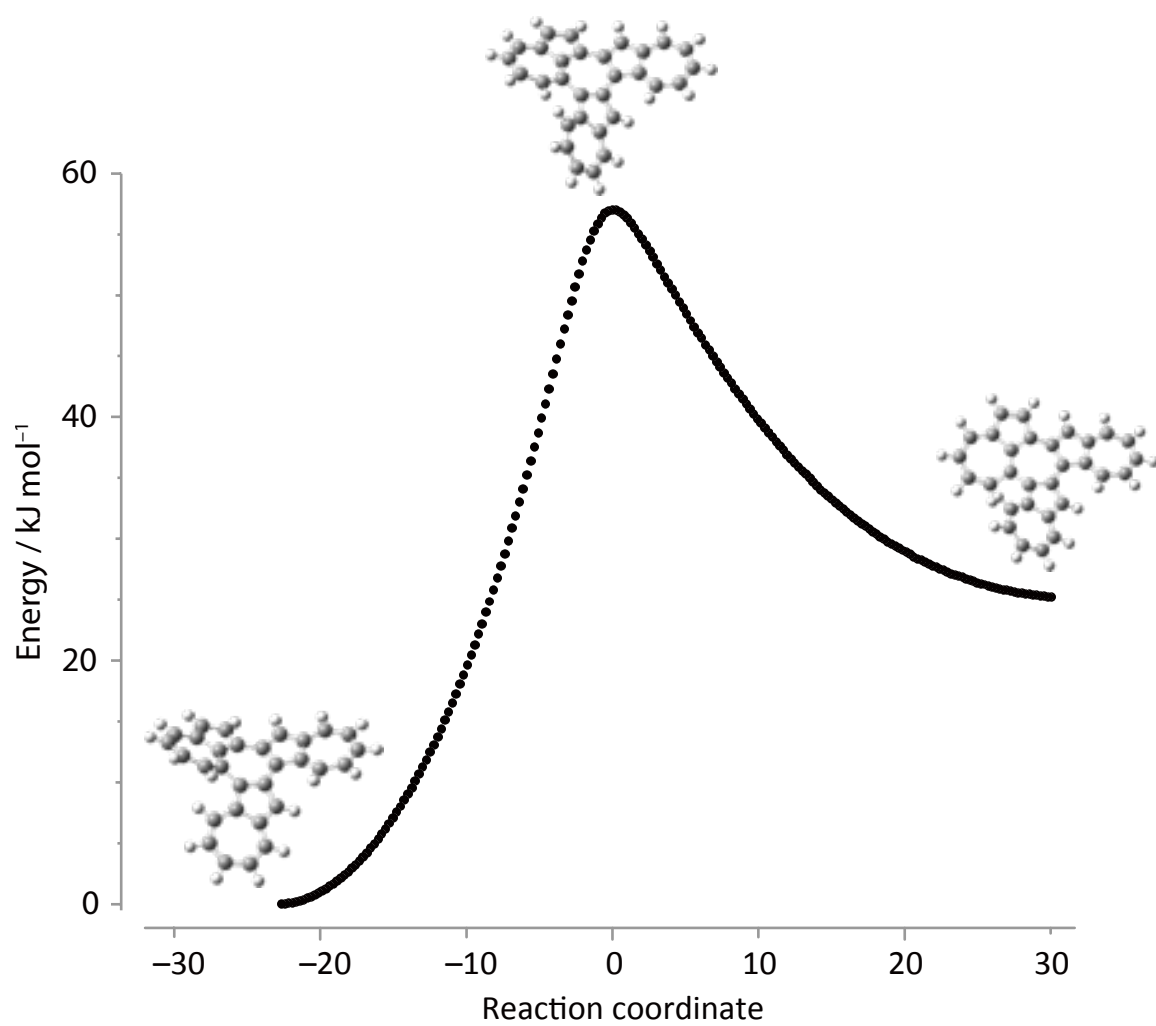

**Figure S11.** Energy profile for the inversion of **4** computed at the IRC-B3LYP/3-21G//B3LYP/3-21G level.

**Table S2.** Crystallographic parameters of **1**, **3**, and **4**•C<sub>60</sub>.

| Compd                                         | <b>1</b> : C <sub>30</sub> H <sub>20</sub> | <b>3</b> : C <sub>30</sub> H <sub>18</sub> | <b>4</b> •C <sub>60</sub> : C <sub>30</sub> H <sub>18</sub> •C <sub>60</sub> •C <sub>6</sub> H <sub>5</sub> Cl |
|-----------------------------------------------|--------------------------------------------|--------------------------------------------|----------------------------------------------------------------------------------------------------------------|
| Crystal system (Space group)                  | triclinic ( $P\bar{1}$ )                   | monoclinic ( $P2_1/c$ )                    | triclinic ( $P\bar{1}$ )                                                                                       |
| <i>a</i> (Å)                                  | 8.971(4)                                   | 12.8311(19)                                | 10.2317(3)                                                                                                     |
| <i>b</i> (Å)                                  | 10.708(5)                                  | 13.989(2)                                  | 13.1426(5)                                                                                                     |
| <i>c</i> (Å)                                  | 10.738(5)                                  | 11.0453(16)                                | 20.7881(5)                                                                                                     |
| $\alpha$ (°)                                  | 80.838(5)                                  | 90                                         | 81.645(3)                                                                                                      |
| $\beta$ (°)                                   | 84.122(6)                                  | 111.612(2)                                 | 81.442(2)                                                                                                      |
| $\gamma$ (°)                                  | 88.022(6)                                  | 90                                         | 69.189(3)                                                                                                      |
| <i>T</i> (K)                                  | 90                                         | 120                                        | 120                                                                                                            |
| <i>V</i> (Å <sup>3</sup> )                    | 1012.9(8)                                  | 1843.2(5)                                  | 2570.97(14)                                                                                                    |
| <i>Z</i>                                      | 2                                          | 4                                          | 2                                                                                                              |
| <i>D</i> <sub>calc</sub> (g/cm <sup>3</sup> ) | 1.247                                      | 1.364                                      | 1.565                                                                                                          |
| Crystal size (mm)                             | 0.324 × 0.323 × 0.189                      | 0.259 × 0.220 × 0.041                      | 0.144 × 0.113 × 0.091                                                                                          |
| Unique data                                   | 4147                                       | 4526                                       | 10070                                                                                                          |
| Parameters                                    | 272                                        | 560                                        | 727                                                                                                            |
| <i>R</i> <sub>1</sub> ( $\sigma > 2.0$ )      | 0.0557                                     | 0.0480                                     | 0.1431                                                                                                         |
| w <i>R</i> <sub>2</sub> ( $\sigma > 2.0$ )    | 0.1728                                     | 0.1364                                     | 0.3816                                                                                                         |
| Goodness-of-fit                               | 1.176                                      | 0.865                                      | 1.061                                                                                                          |

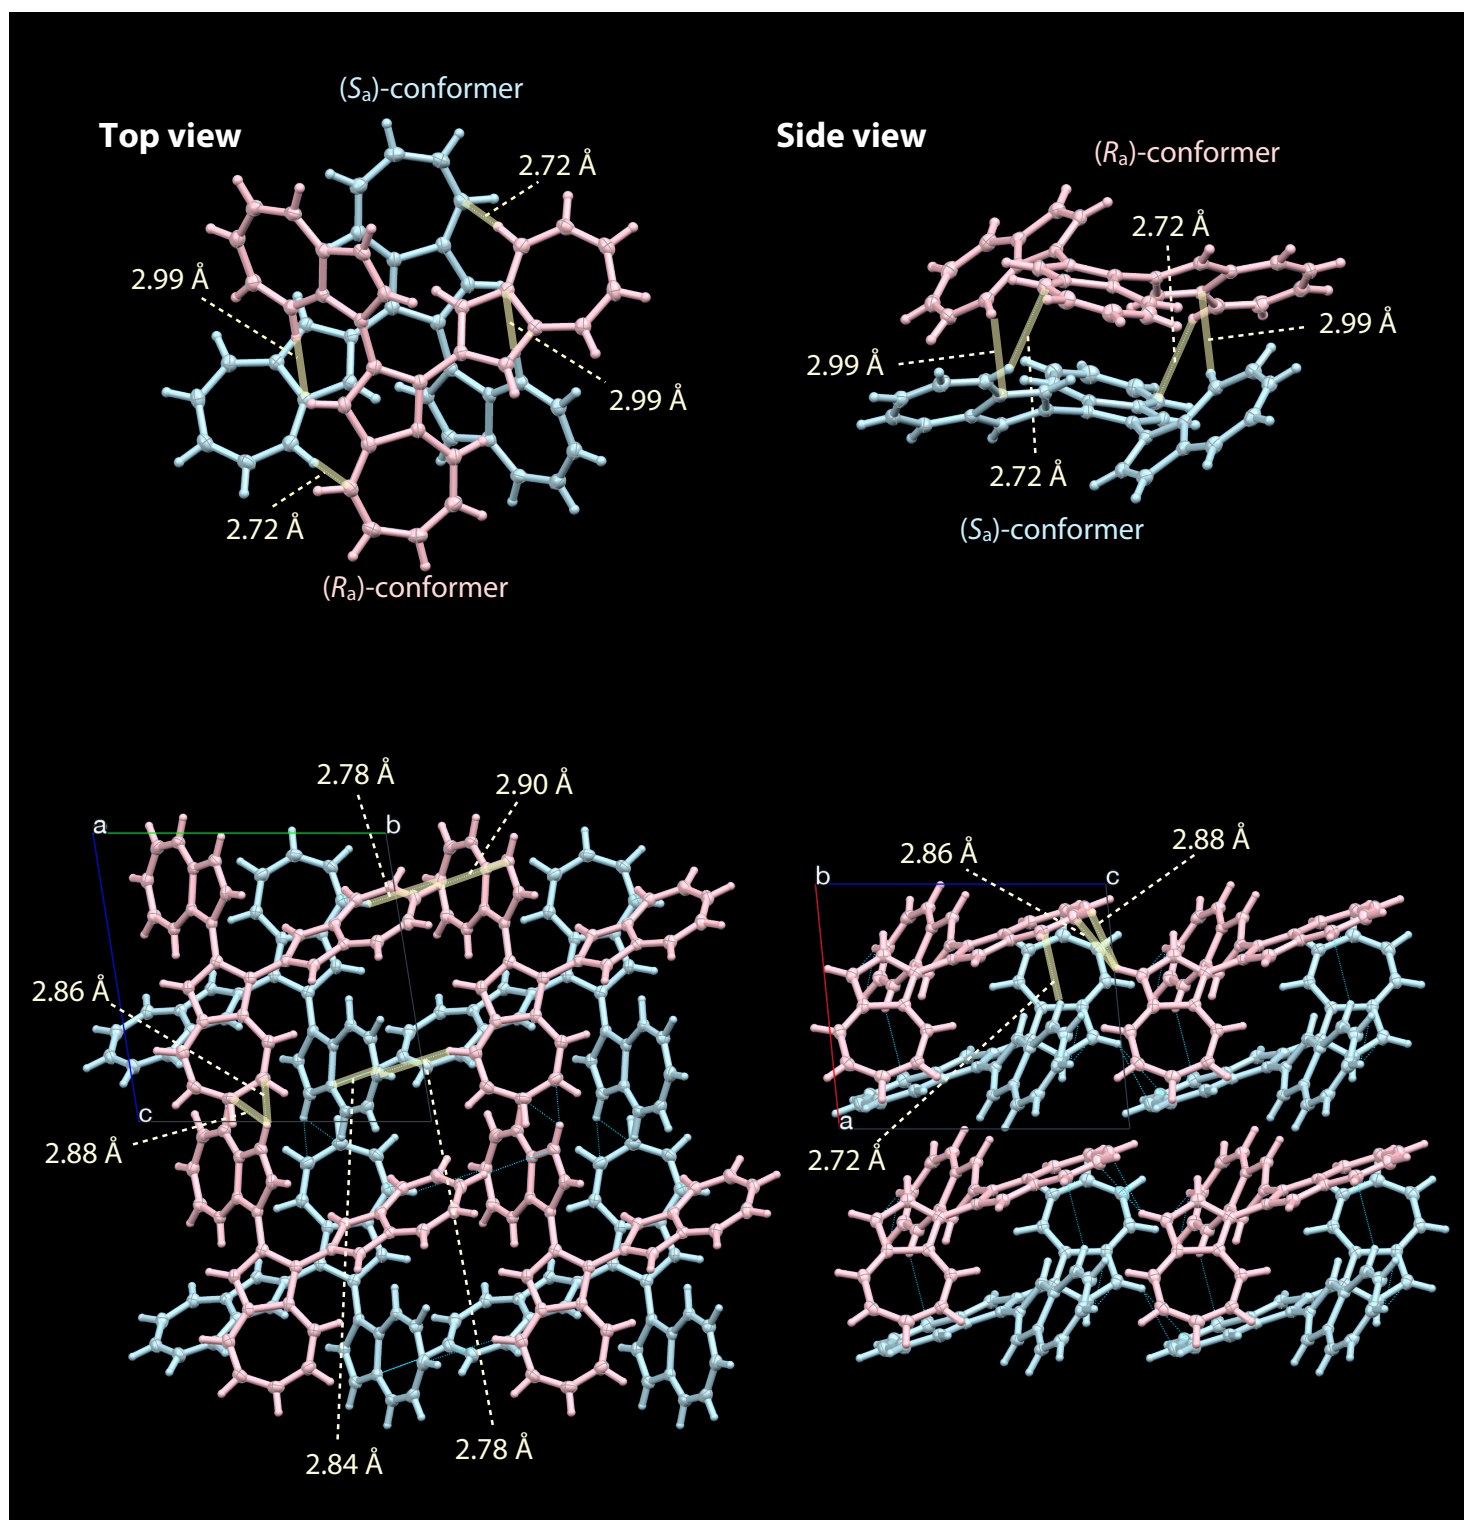

Figure S12. Crystal packing of 1.

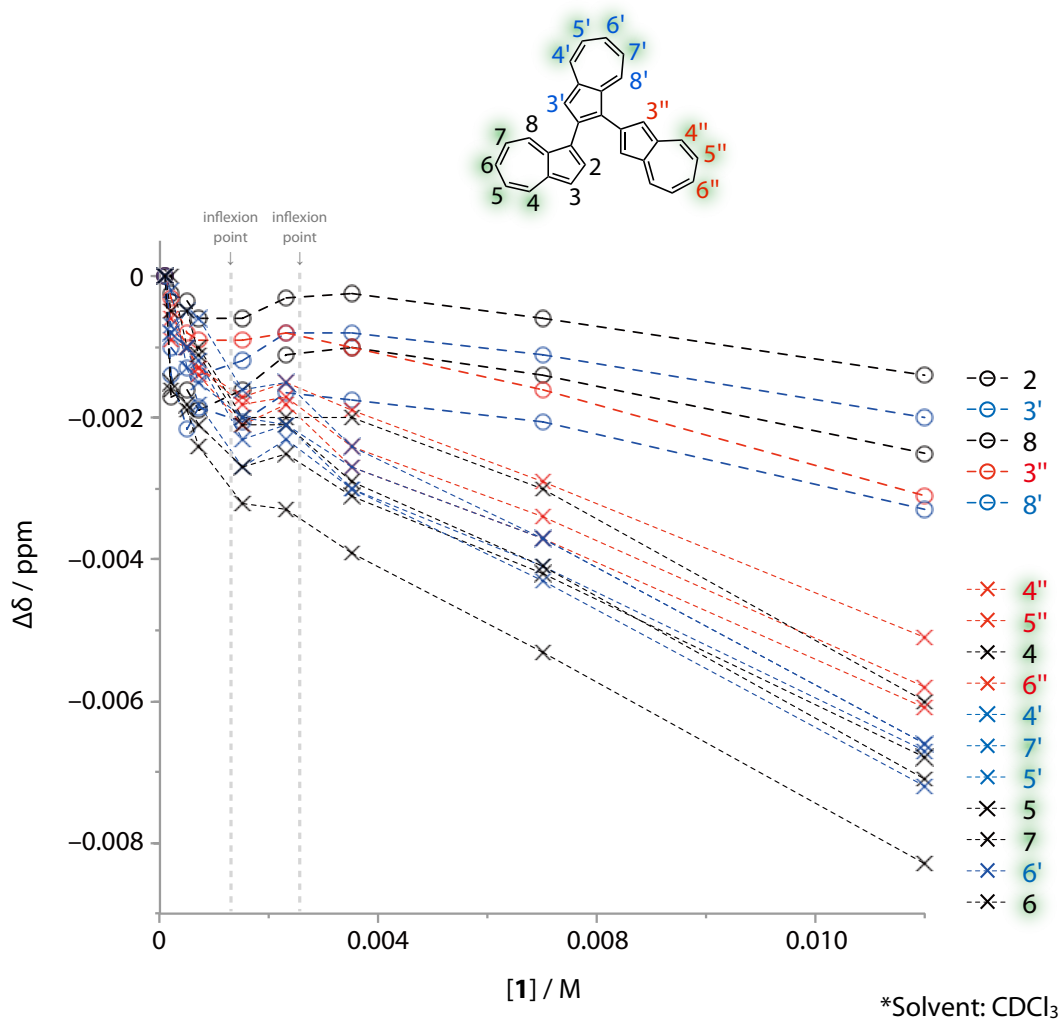

**Figure S13.** Concentration dependence of chemical shift of  $^1\text{H}$  NMR signal of **1**.

## Optimized structures

Top views

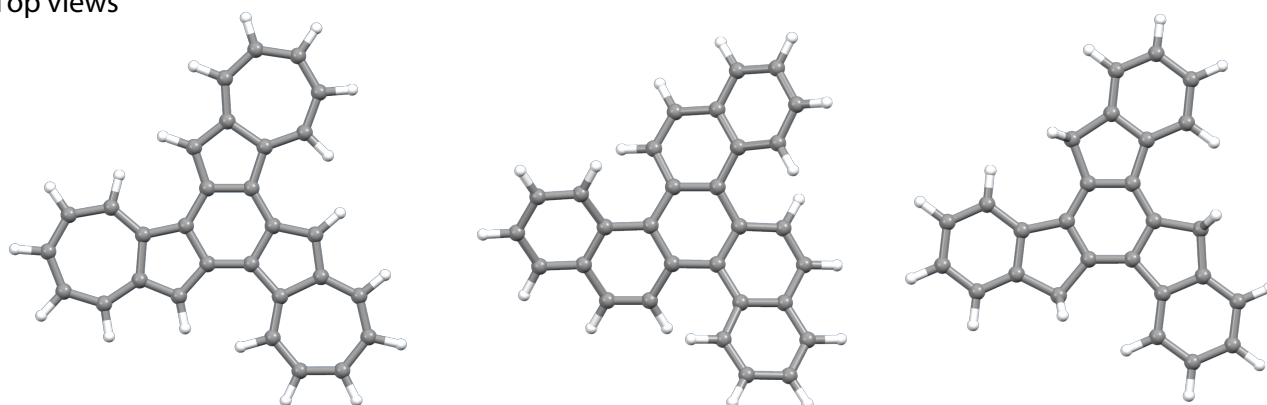

Side views

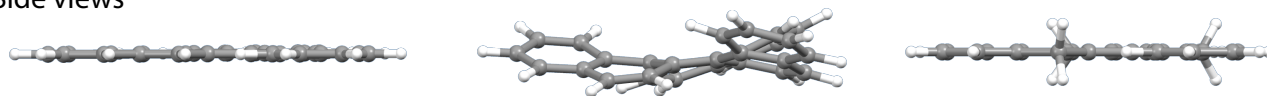

( $C_{3h}$ )

( $C_3$ )

( $C_{3h}$ )

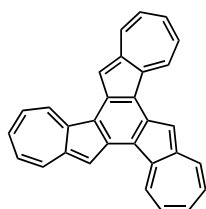

**1**

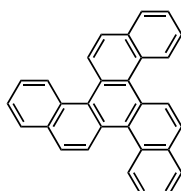

benzo[c]naphtho[2,1-*p*]chrysene

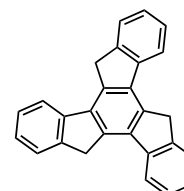

truxene

## HOMO-LUMO levels

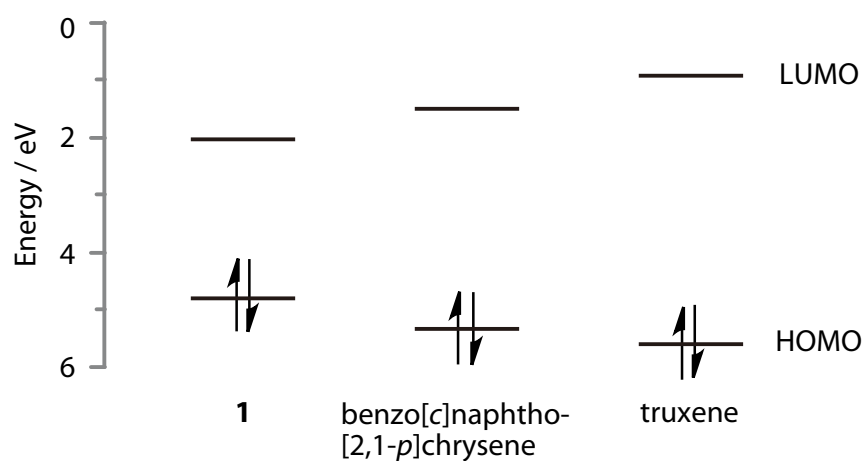

(B3LYP/6-31G\* level)

**Figure S14.** Optimized structures and HOMO-LUMO levels of **1**, benzo[*c*]naphtho[2,1-*p*]chrysene, and truxene.

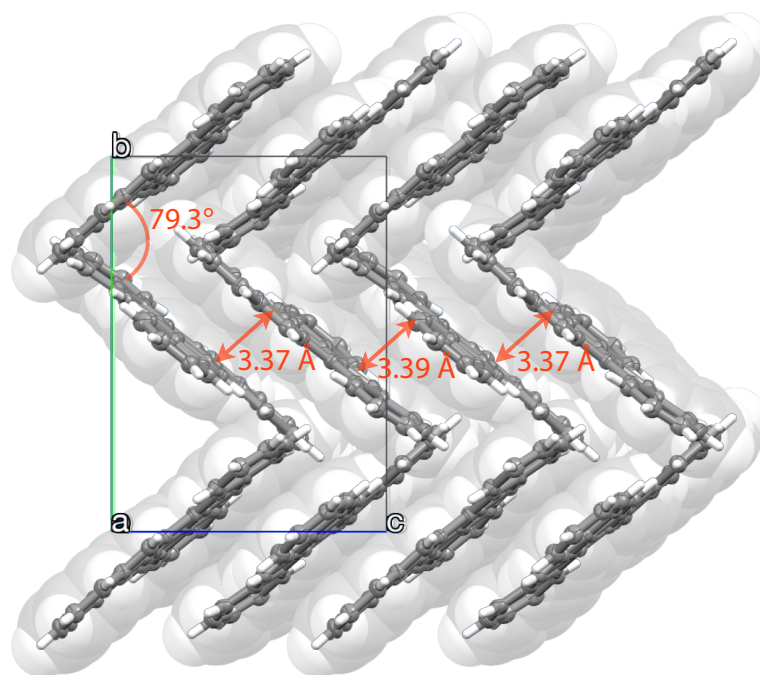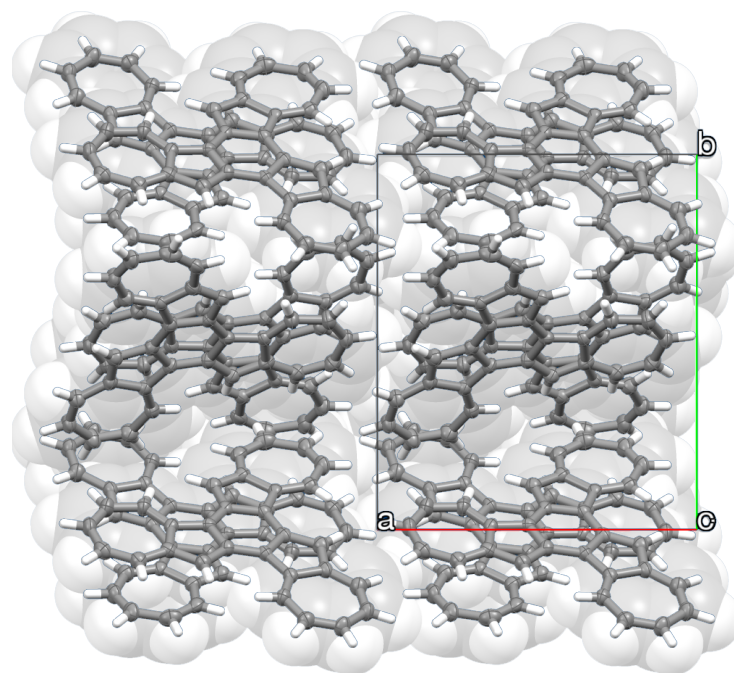

**Figure S15.** Crystal packing of **3**.

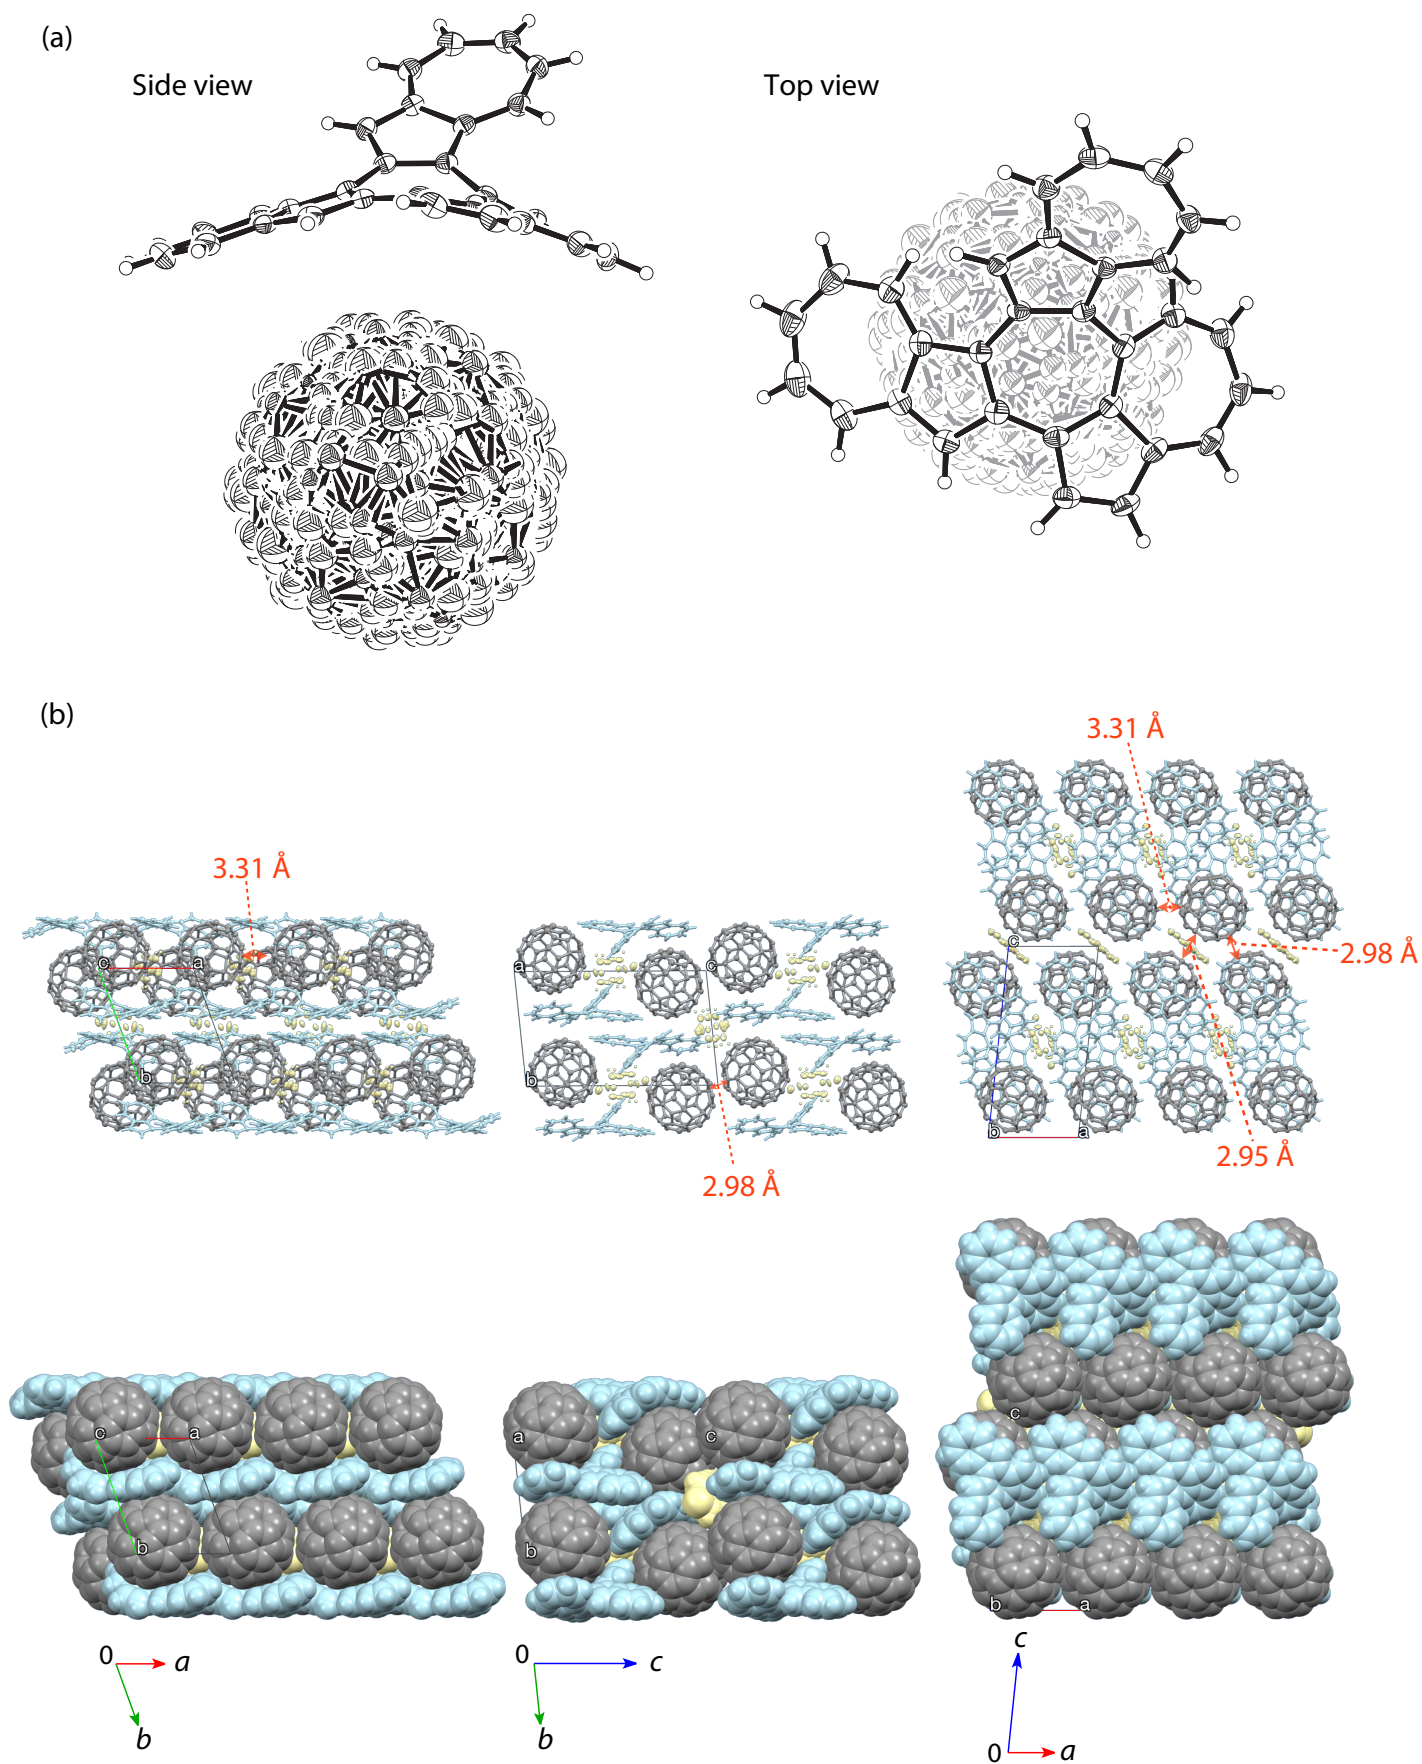

**Figure S16.** (a) ORTEP drawings of  $4 \cdot C_{60}$ . Chlorobenzene molecule is omitted for clarity. (b) Crystal packing of  $4 \cdot C_{60} \cdot PhCl$ .



Experimental (X-ray analysis)

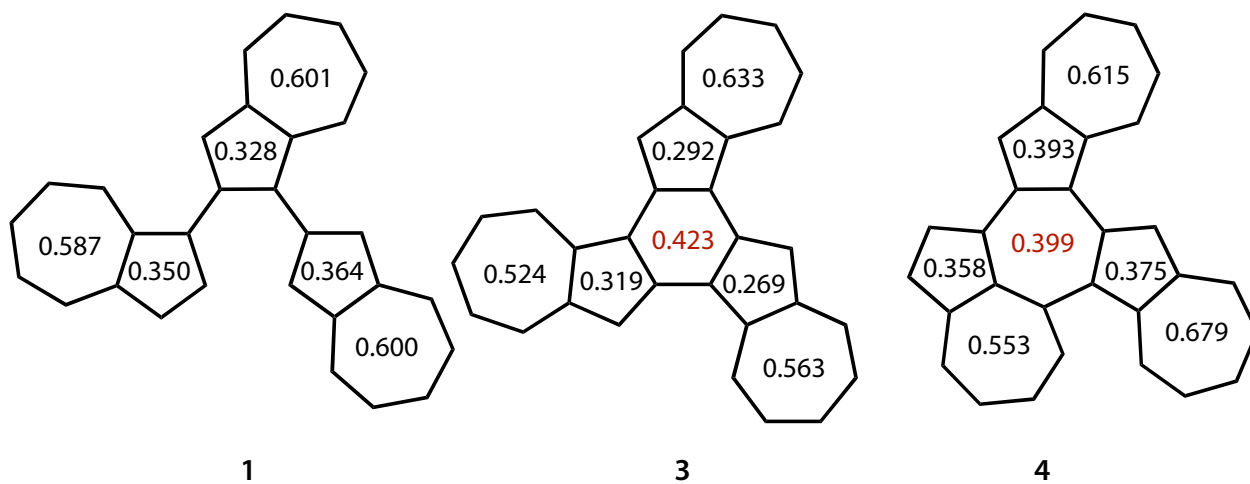

Calculation (B3LYP/6-31G\* level)

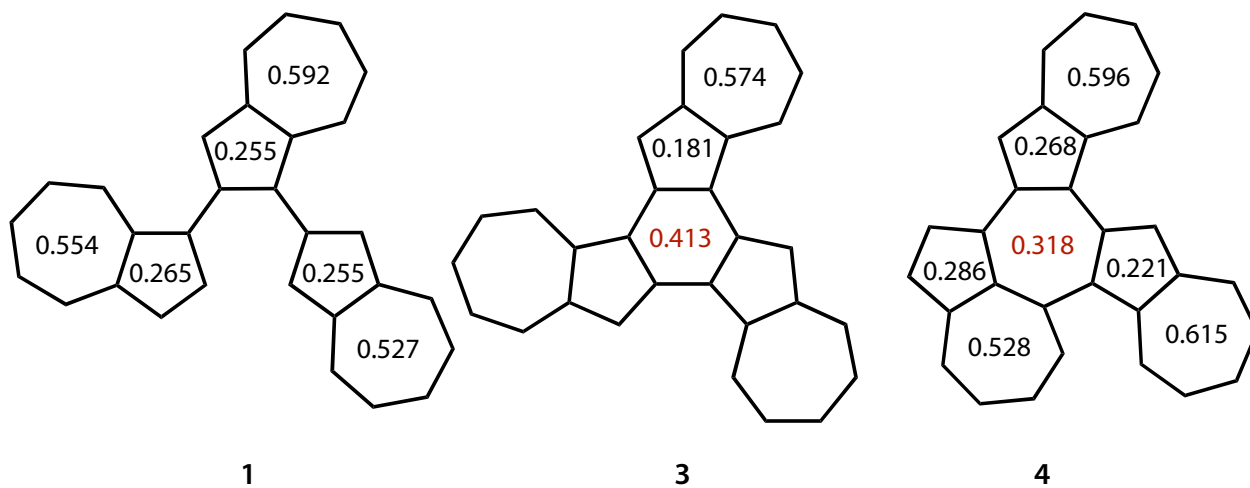

**Figure S17.** Harmonic oscillator model of aromaticity (HOMA) values of **1**, **3**, and **4** reduced from the structures obtained by (a) single-crystal X-ray analysis and by (b) theoretical calculation.

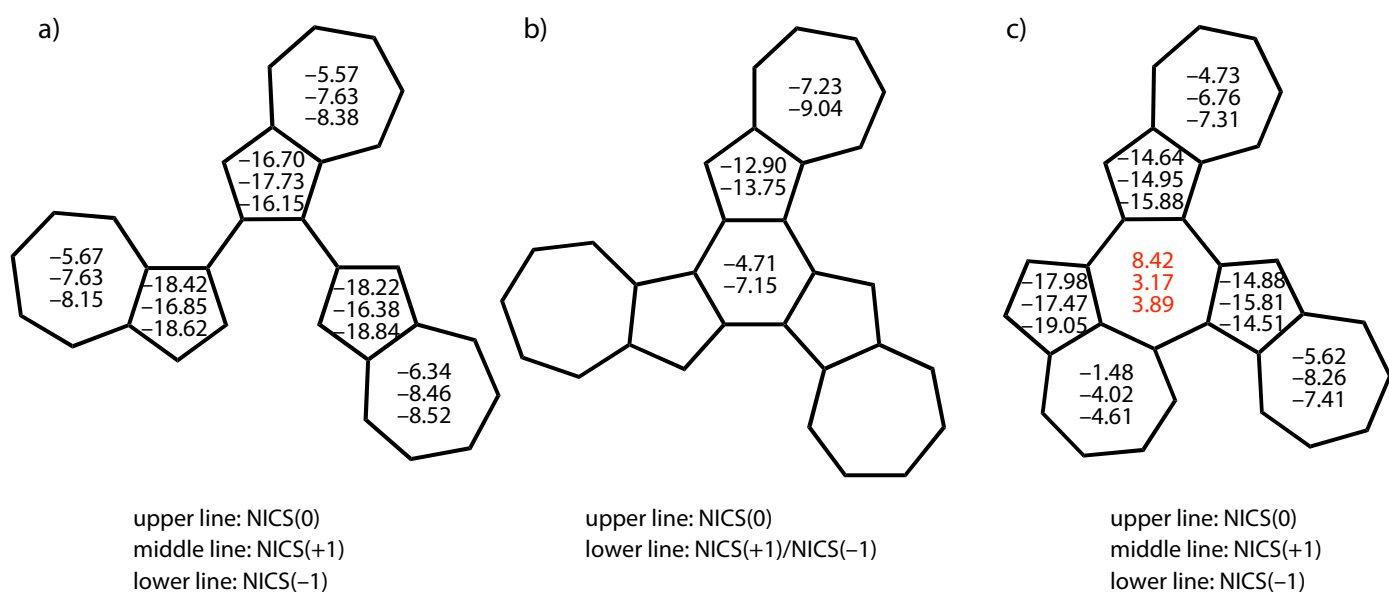

\* GIAO-HF/6-311+G(2d,p)//B3LYP/6-31G(d) level.

**Figure S18.** Nucleus-independent chemical shift [NICS(0) (upper), NICS(+1) (middle), and NICS(-1) (lower)] values of a) **1**, b) **3**, and c) **4**.

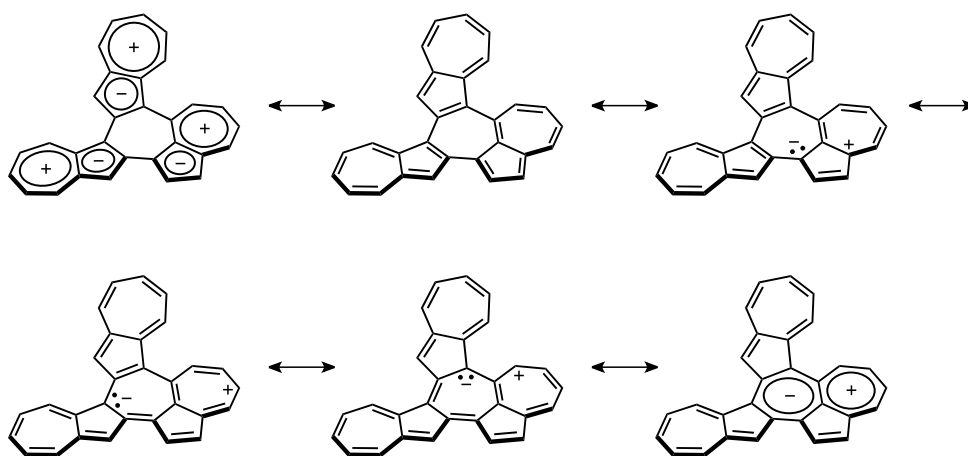

**Figure S19.** The speculated resonance structures of **4**.

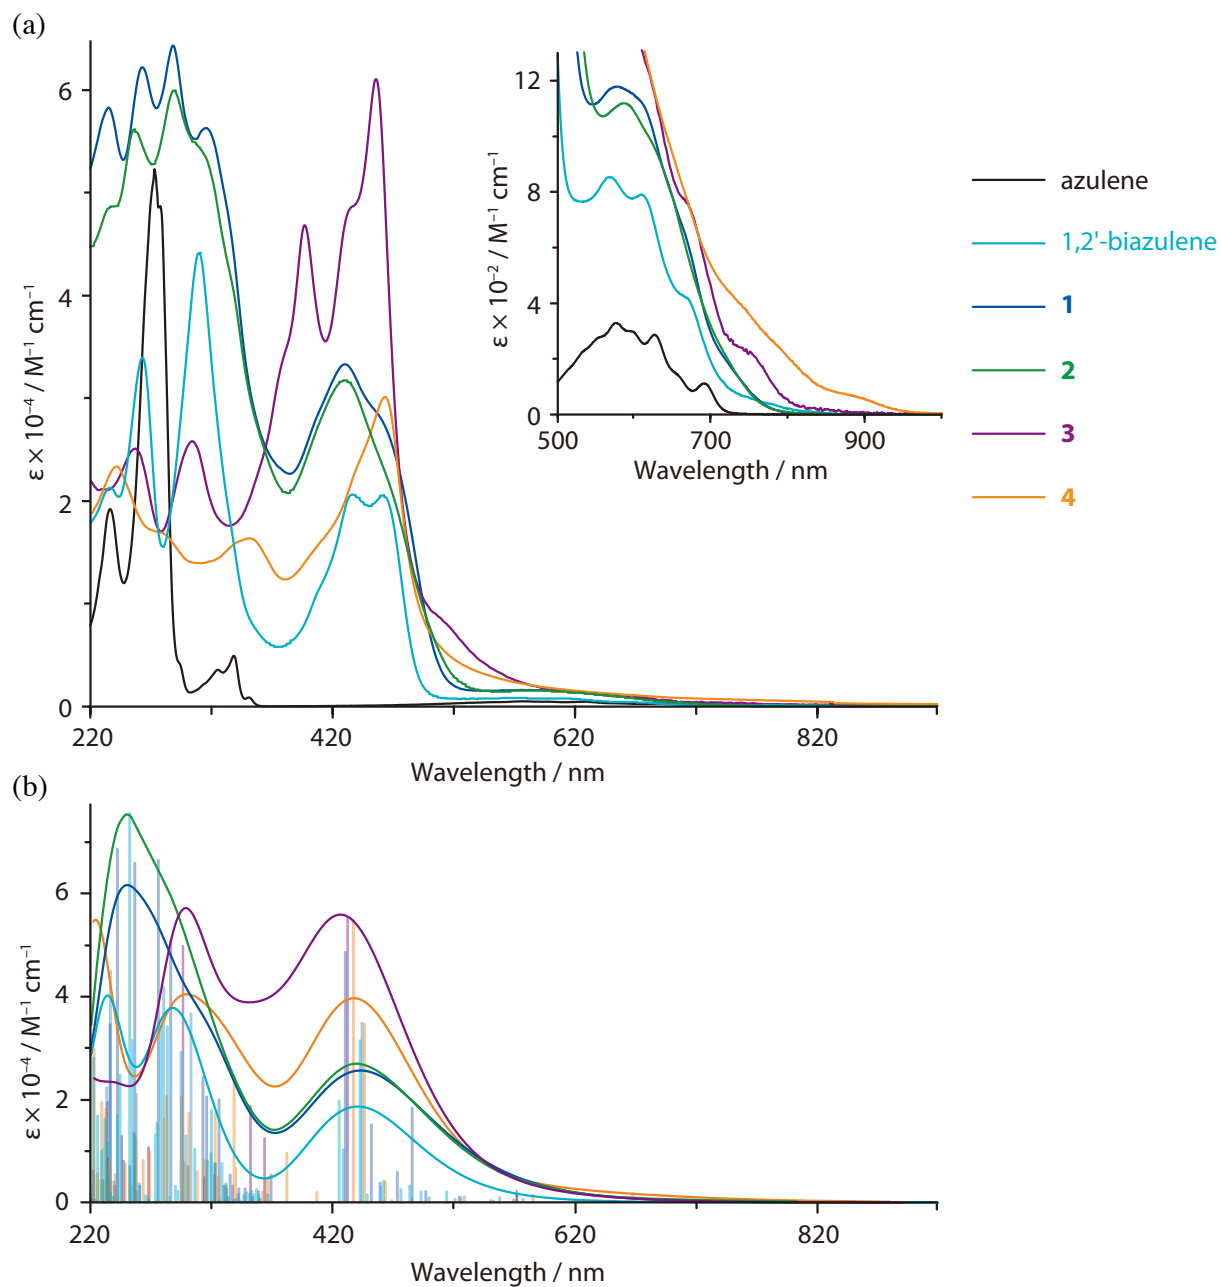

**Figure S20.** (a) UV-vis absorption spectra of azulene, 1,2'-biazulene, and **1–4** in THF. (b) TD-DFT calculation of 1,2'-biazulene, and **1–4** at TD-B3LYP/6-31G\*\*/M06-2X/6-31G\* level for **2** (*syn*-form) and TD-B3LYP/6-31G\*\*/B3LYP/6-31G\* level for others.

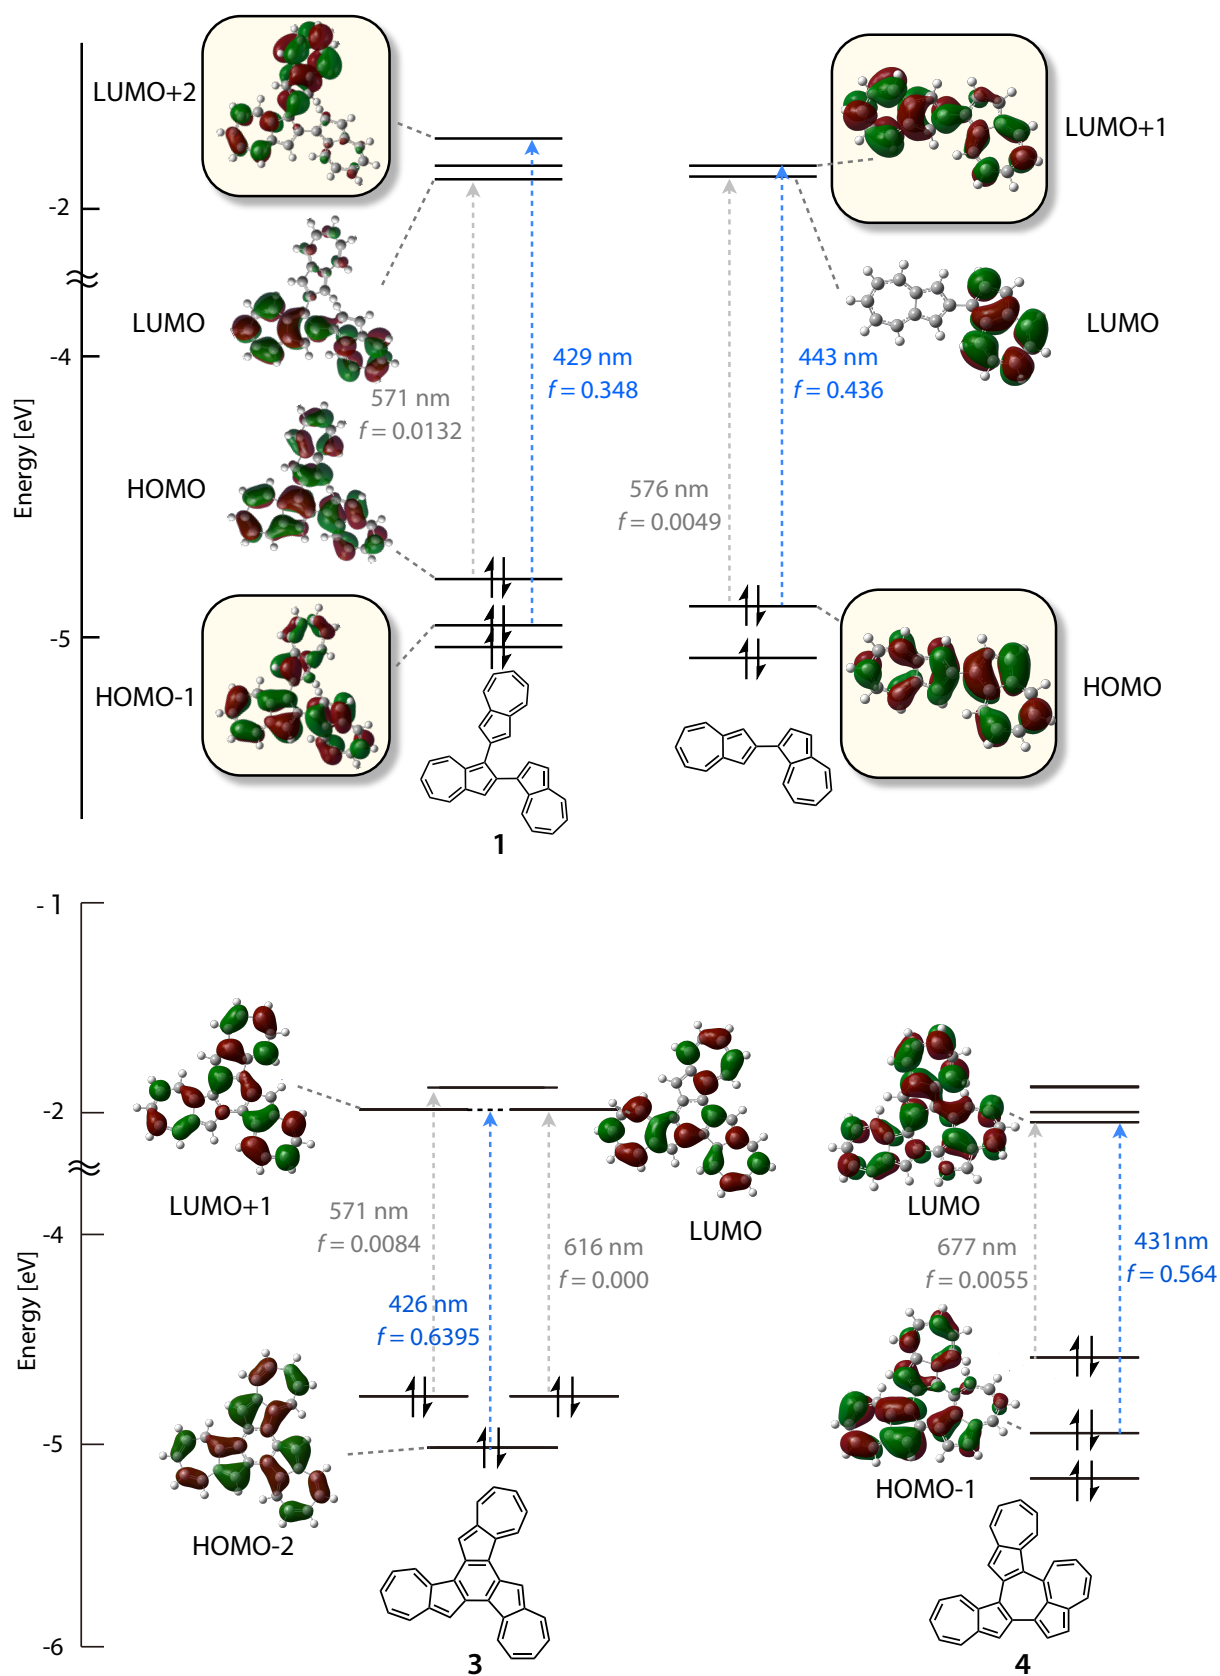

**Figure S21.** (a) MO diagrams of 1,2'-biazulene, **1**, **3**, and **4** calculated at TD-B3LYP/6-31G\*//B3LYP/6-31G\* level.

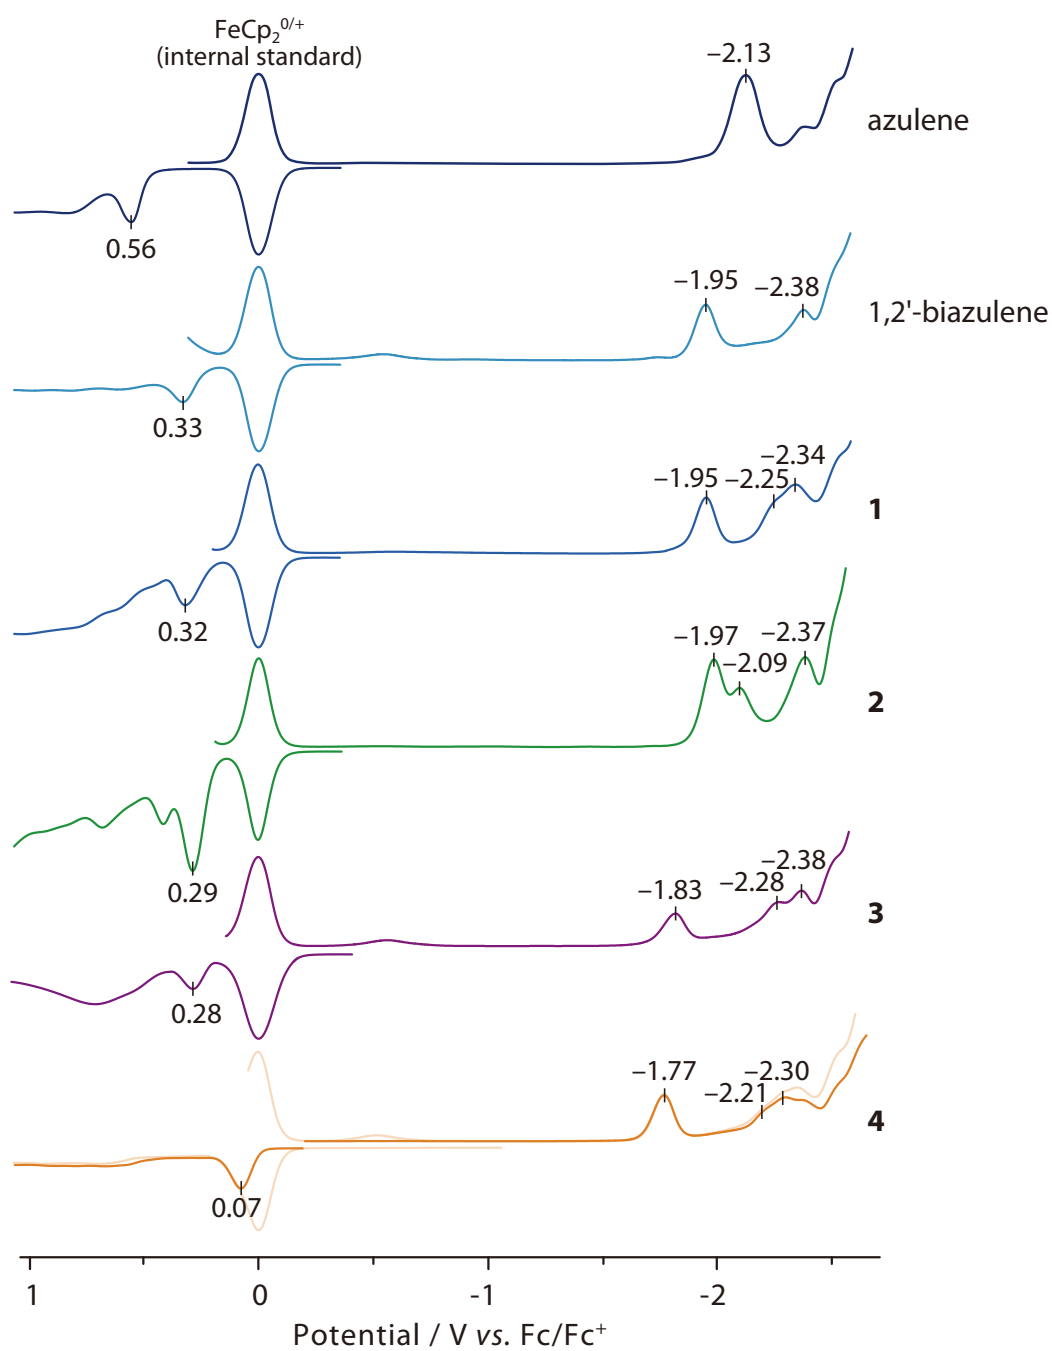

**Figure S22.** Square wave voltammograms of azulene, 1,2'-biazulene, and **1–4** (1.0 mM) on a Pt electrode in 1.0 M *n*Bu<sub>4</sub>NPF<sub>6</sub>, PhCN. All solutions contain a ferrocene internal standard (1.0 mM).

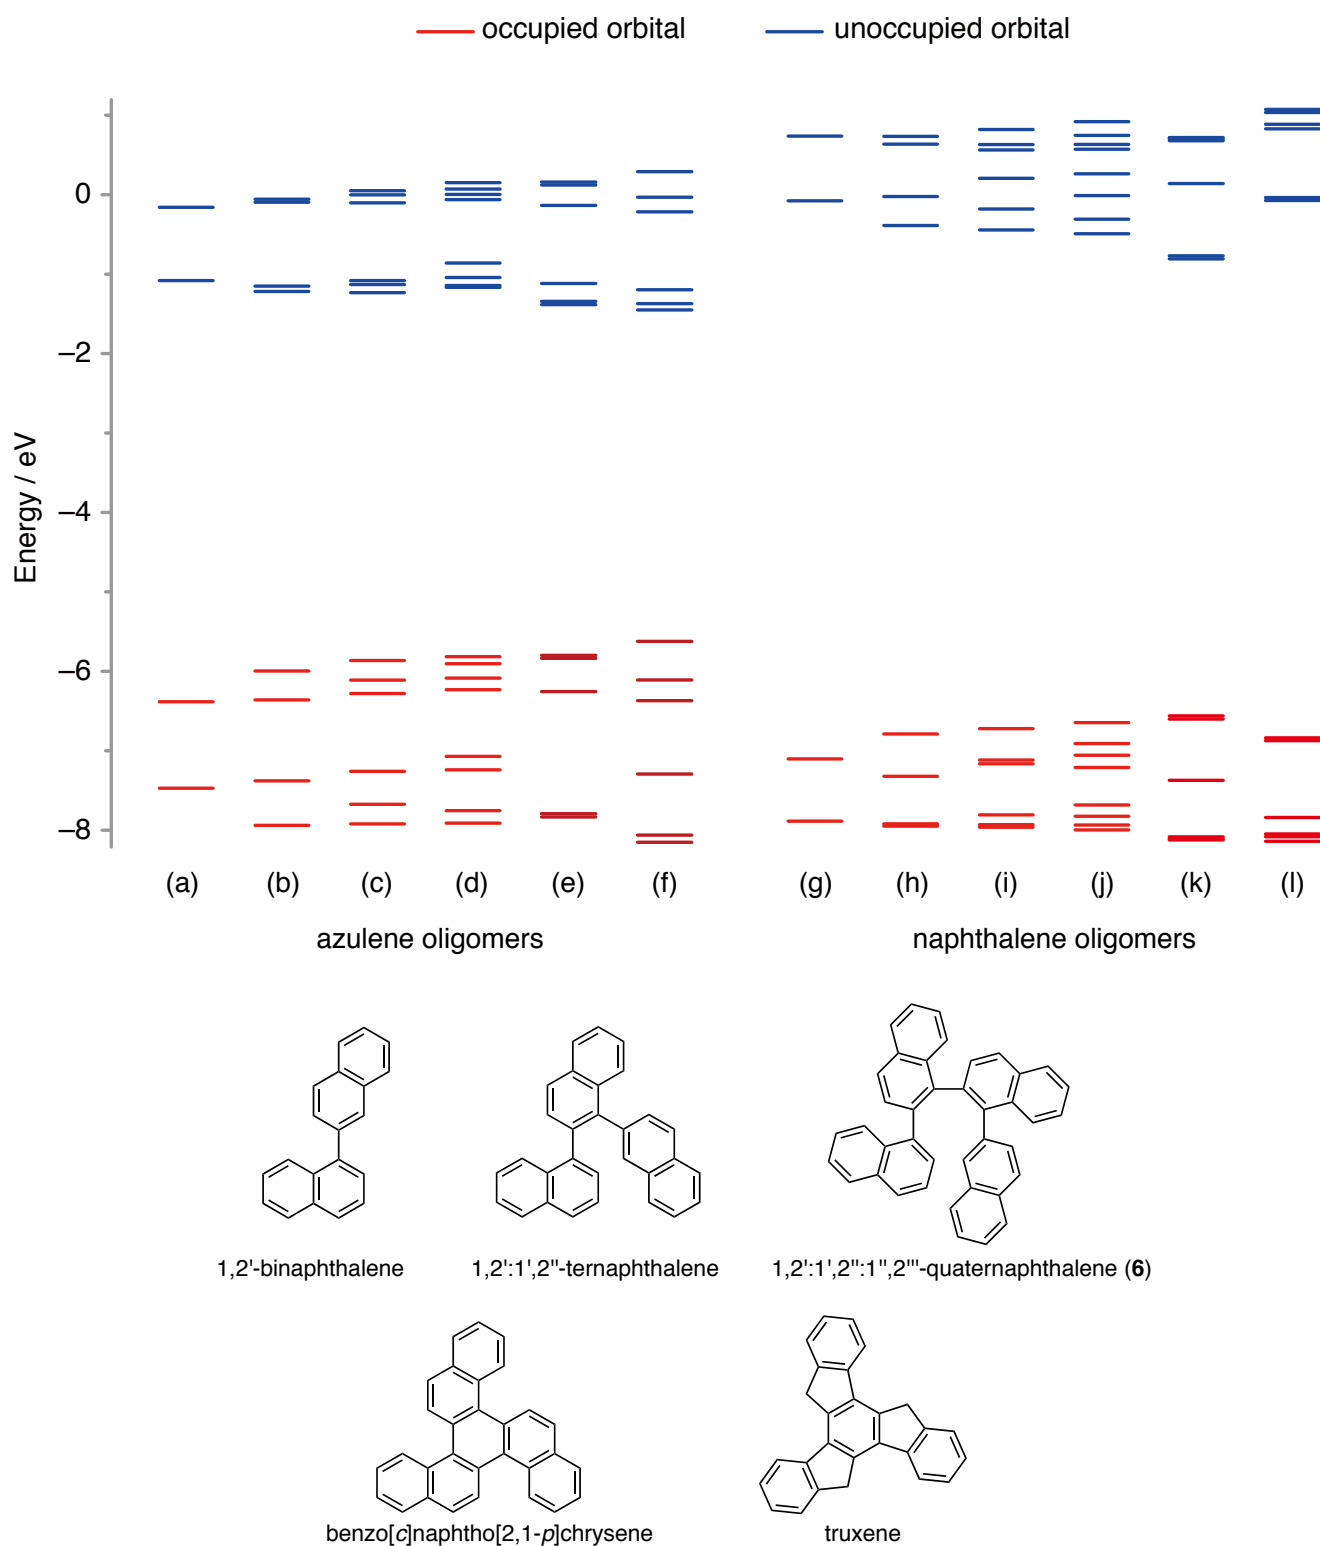

**Figure S23.** MO diagrams of (a) azulene, (b) 1,2'-biazulene, (c) **1**, (d) **2**, (e) **3**, (f) **4**, (g) naphthalene, (h) 1,2'-binaphthalene, (i) 1,2':1',2''-ternaphthalene, (j) 1,2':1',2'':1'',2'''-quaternaphthalene (**6**), (k) benzo[*c*]naphtho[2,1-*p*]chrysene, and (l) truxene calculated at B3LYP/6-31G\* level.
